# Supplementary material for: Safety of Symptomatic Slow-Acting Drugs for Osteoarthritis: Outcomes of a Systematic Review and Meta-Analysis
Source: PubMed Central journal article supplement — Drugs Aging. 2019 May 9;36(Suppl 1):65–99. doi: 10.1007/s40266-019-00662-z (PMC6509099; doi:10.1007/s40266-019-00662-z), 2019-05-09

**Drugs and Aging, 2019**

**Supplement: Safety of Anti-Osteoarthritis Medications**

**Safety of symptomatic slow-acting drugs in osteoarthritis: outcomes of a systematic review and meta-analysis**

Germain Honvo, Jean-Yves Reginster, Véronique Rabenda, Anton Geerinck, Ouafa Mkinsi, Alexia Charles, Rene Rizzoli, Cyrus Cooper, Bernard Avouac, Olivier Bruyère

**ELECTRONIC SUPPLEMENTARY MATERIAL 2**

## A) Glucosamine sulfate

**Figure 14:** Forest plot displaying the results of the meta-analyses comparing gastrointestinal disorders with glucosamine sulfate versus placebo in patients with OA: Overall analysis and analyses of studies with and without concomitant anti-OA medication allowed

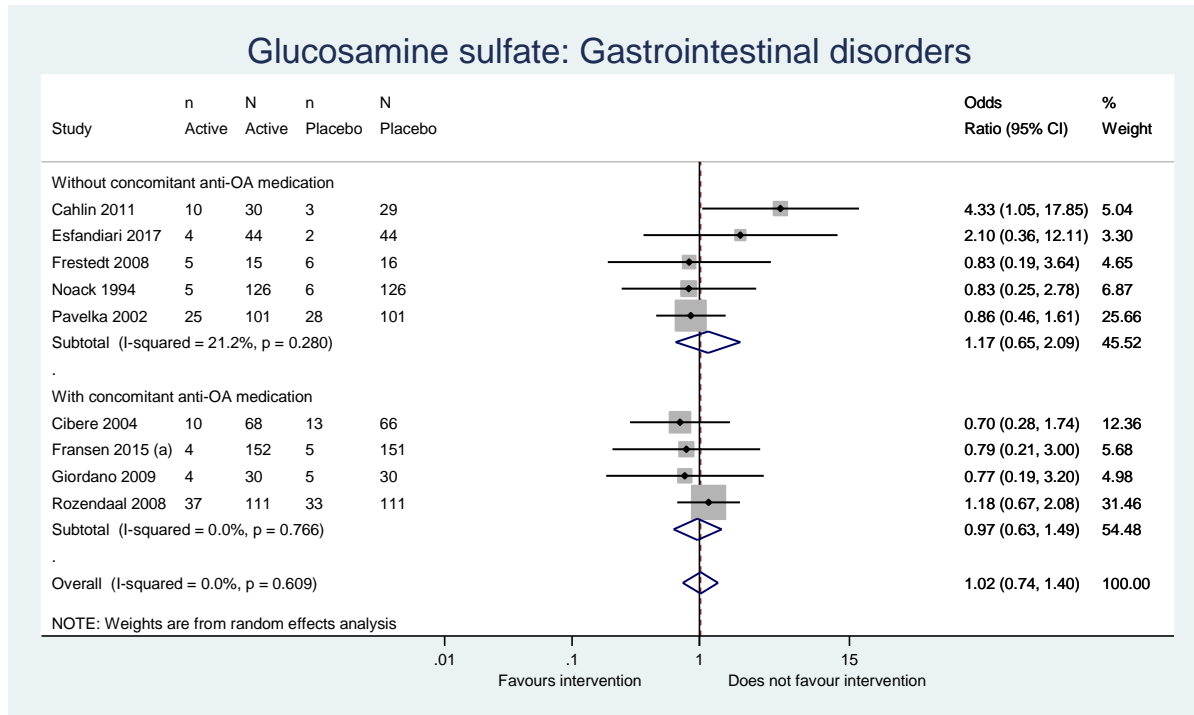

**Figure 15:** Forest plot displaying the results of the meta-analyses comparing cardiac disorders with glucosamine sulfate versus placebo in patients with OA: Overall analysis and analyses of studies with and without concomitant anti-OA medication allowed

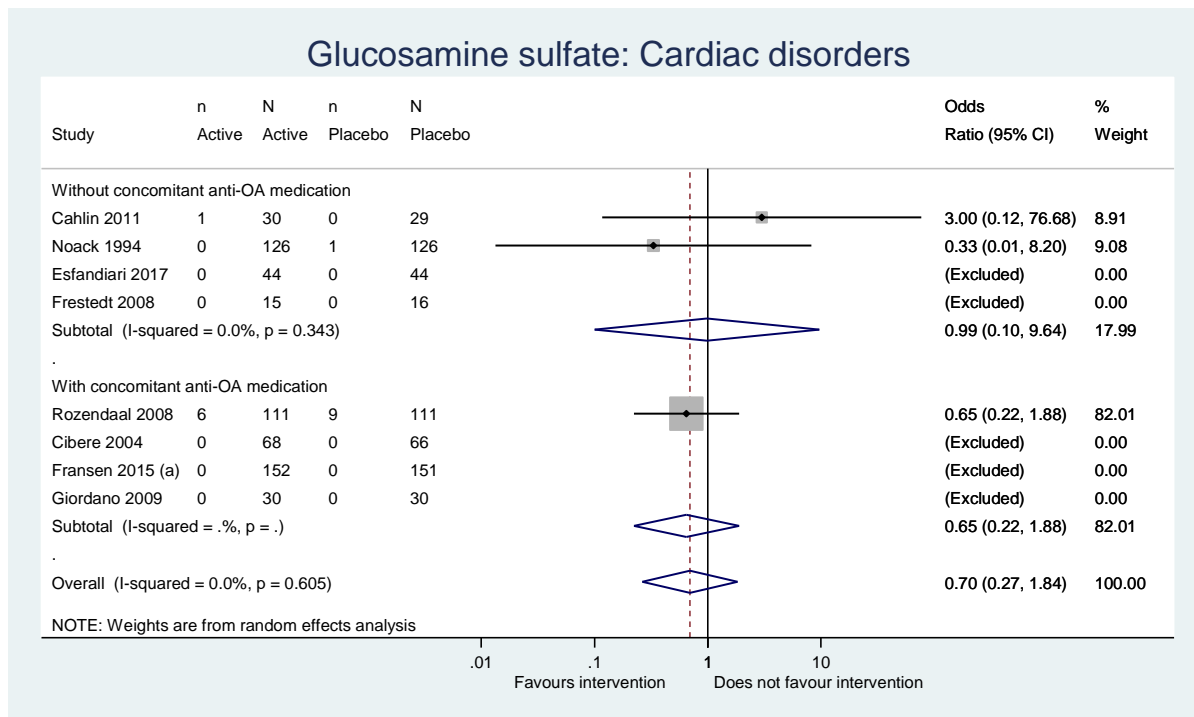

**Figure 16:** Forest plot displaying the results of the meta-analyses comparing vascular disorders with glucosamine sulfate versus placebo in patients with OA: Overall analysis and analyses of studies with and without concomitant anti-OA medication allowed

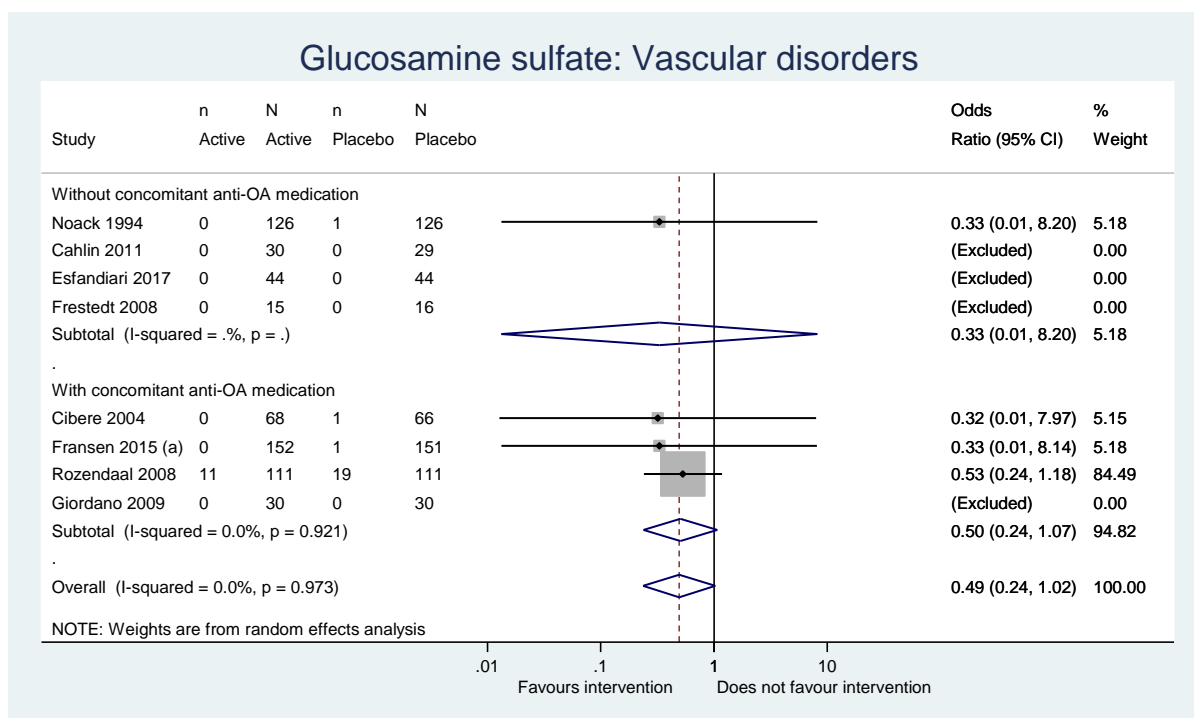

**Figure 17:** Forest plot displaying the results of the meta-analyses comparing nervous system disorders with glucosamine sulfate versus placebo in patients with OA: Overall analysis and analyses of studies with and without concomitant anti-OA medication allowed

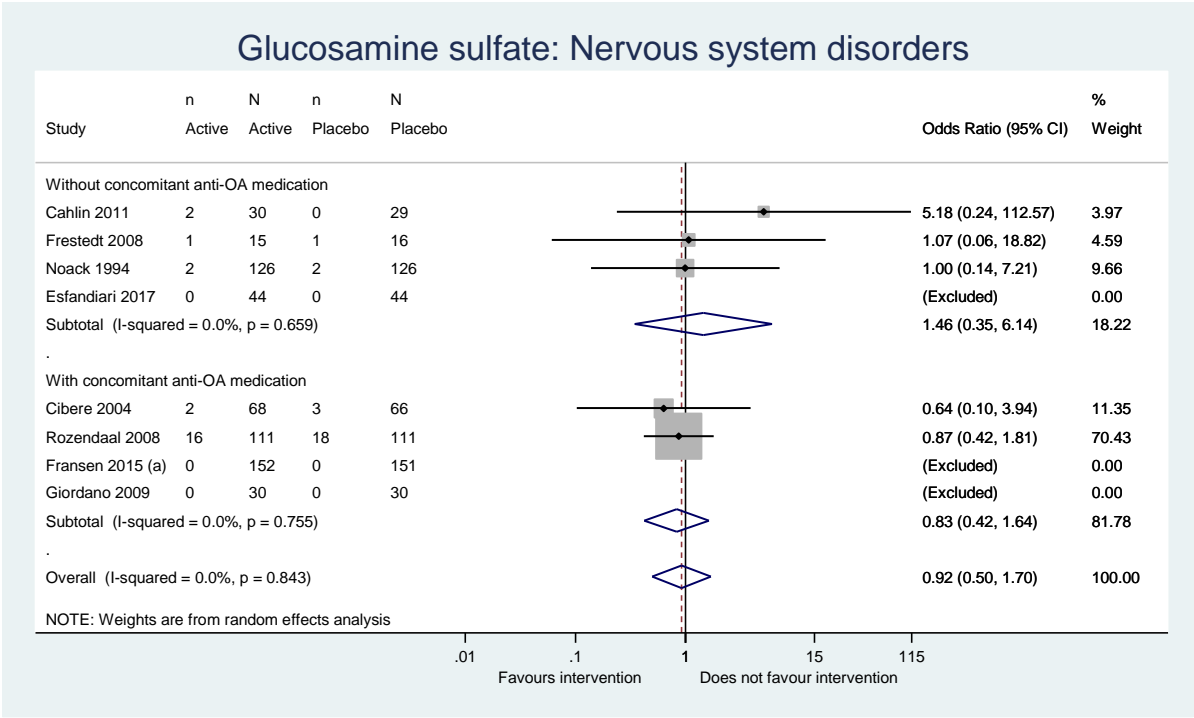

**Figure 18:** Forest plot displaying the results of the meta-analyses comparing dermatological disorders with glucosamine sulfate versus placebo in patients with OA: Overall analysis and analyses of studies with and without concomitant anti-OA medication allowed

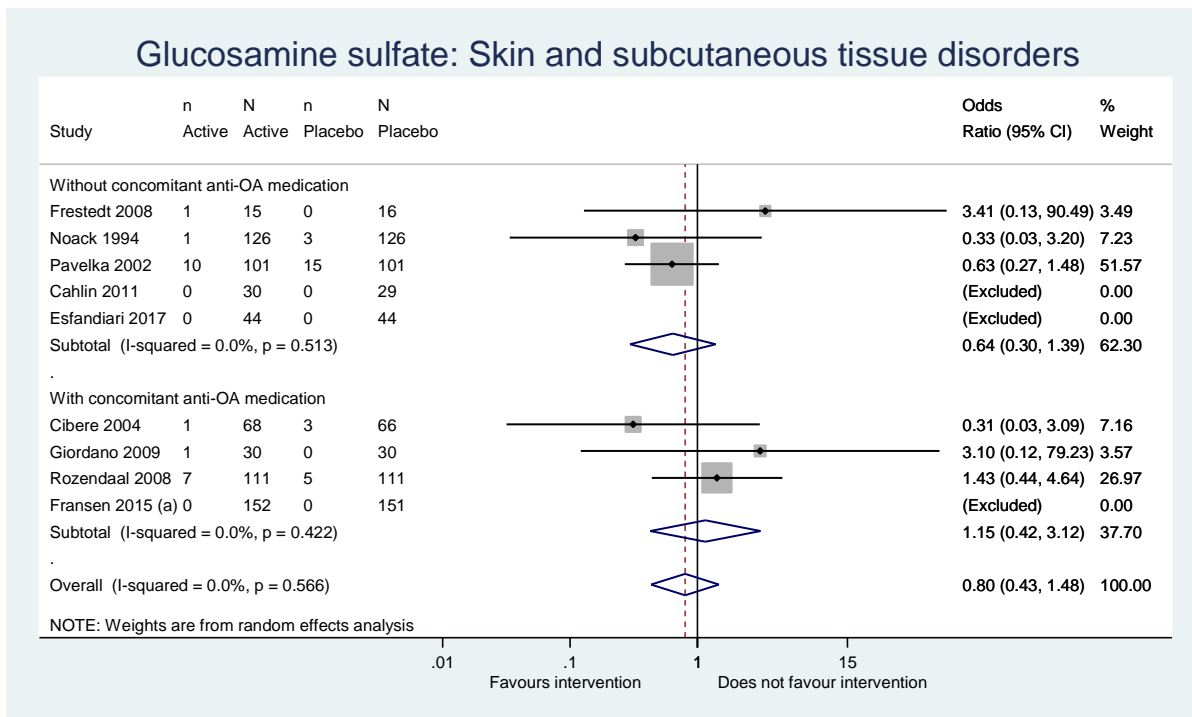

**Figure 19:** Forest plot displaying the results of the meta-analyses comparing musculoskeletal and connective tissue disorders with glucosamine sulfate versus placebo in patients with OA: Overall analysis and analyses of studies with and without concomitant anti-OA medication allowed

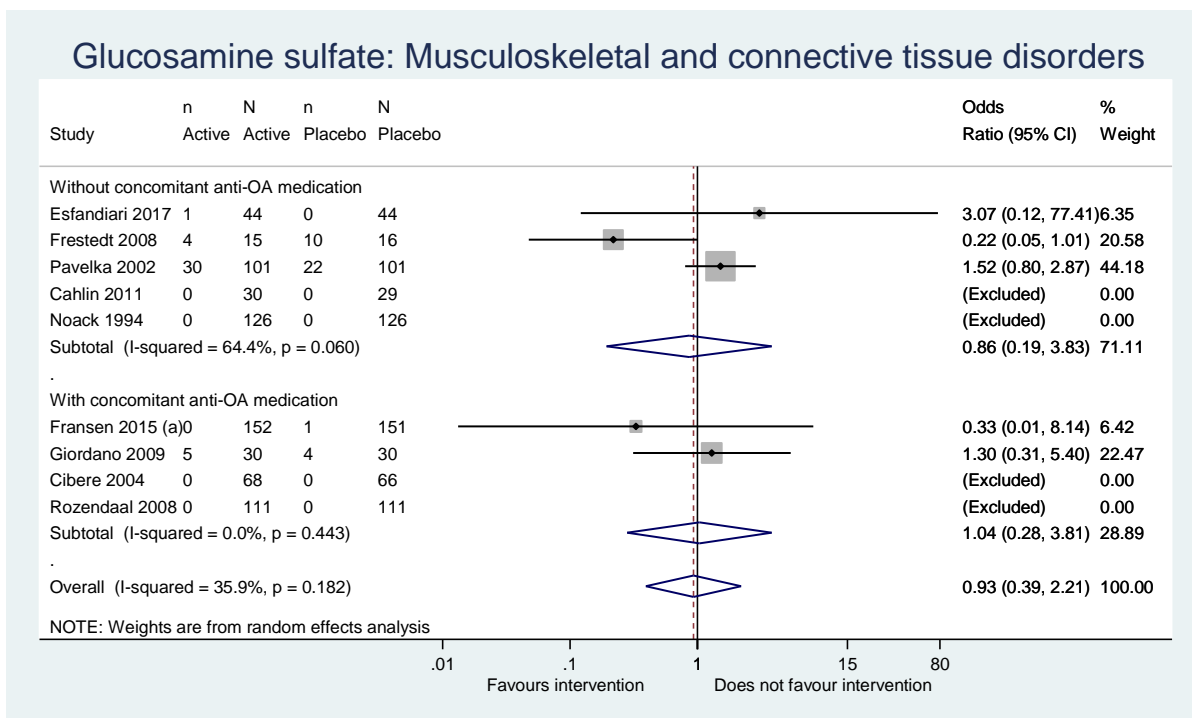

**Renal and urinary disorders:** Zero events with GS and placebo in all included studies.

**Figure 20:** Forest plot displaying the results of the meta-analyses comparing severe adverse events with glucosamine sulfate versus placebo in patients with OA: Overall analysis and analyses of studies with and without concomitant anti-OA medication allowed

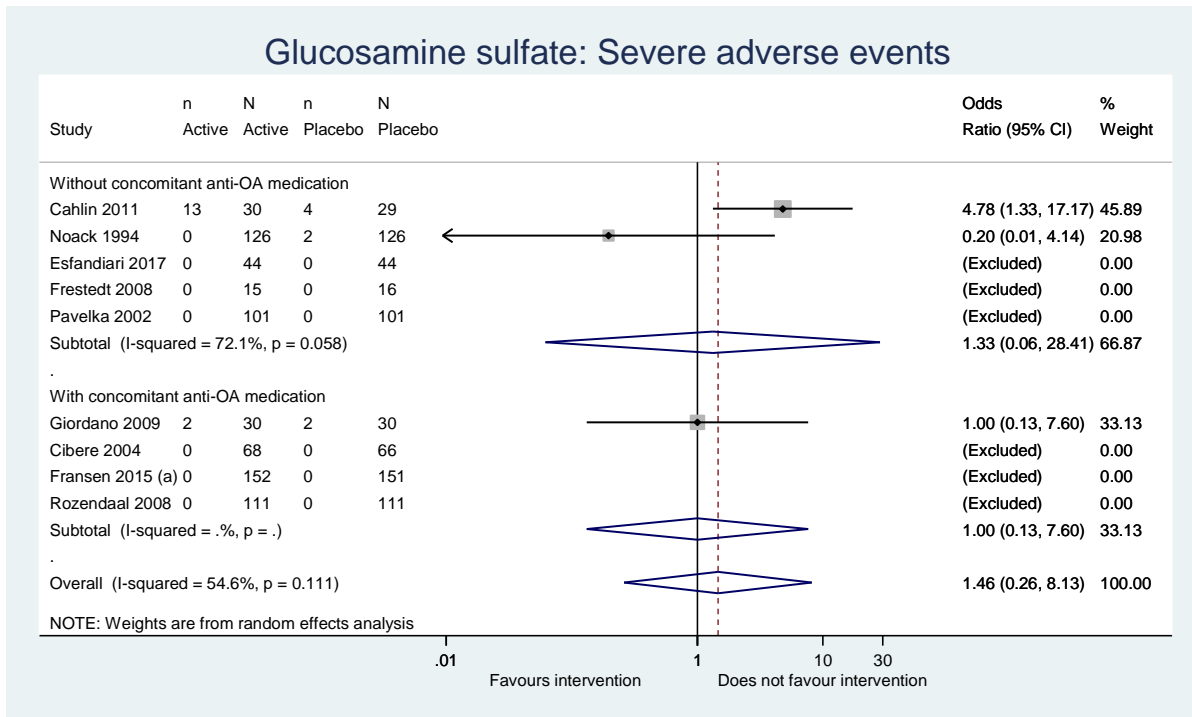

**Figure 21:** Forest plot displaying the results of the meta-analyses comparing serious adverse events with glucosamine sulfate versus placebo in patients with OA: Overall analysis and analyses of studies with and without concomitant anti-OA medication allowed

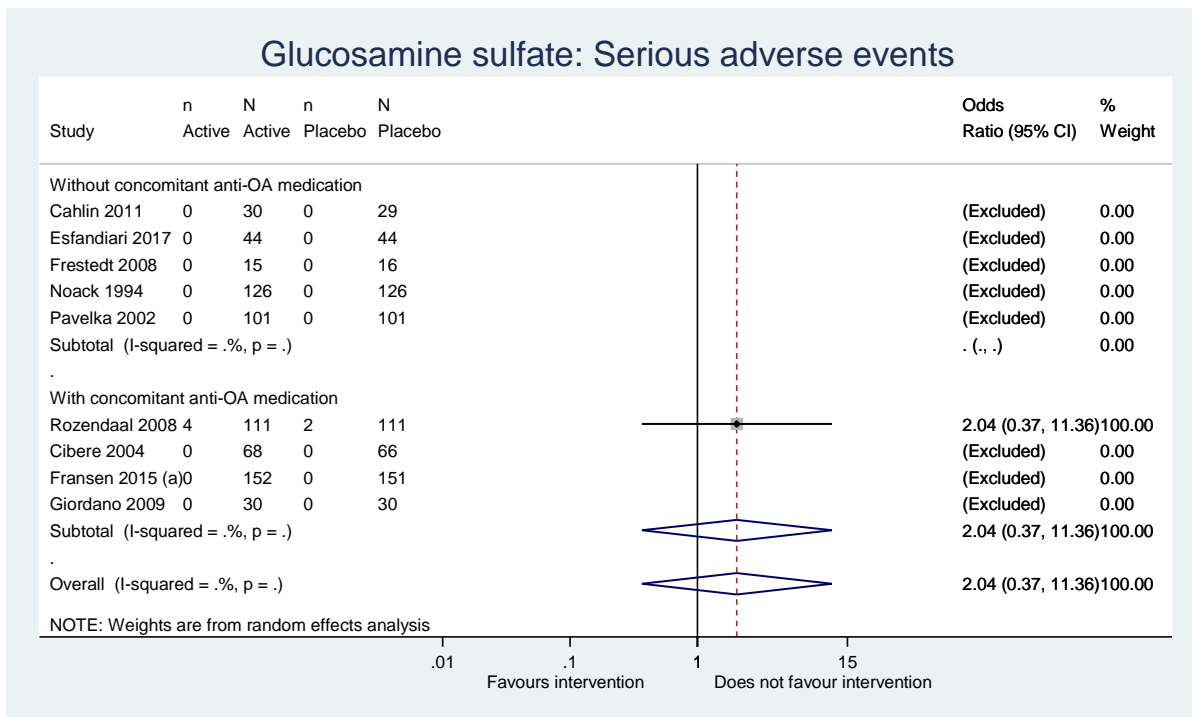

**Figure 22:** Forest plot displaying the results of the meta-analyses comparing dropouts due to adverse event with glucosamine sulfate versus placebo in patients with OA: Overall analysis and analyses of studies with and without concomitant anti-OA medication allowed

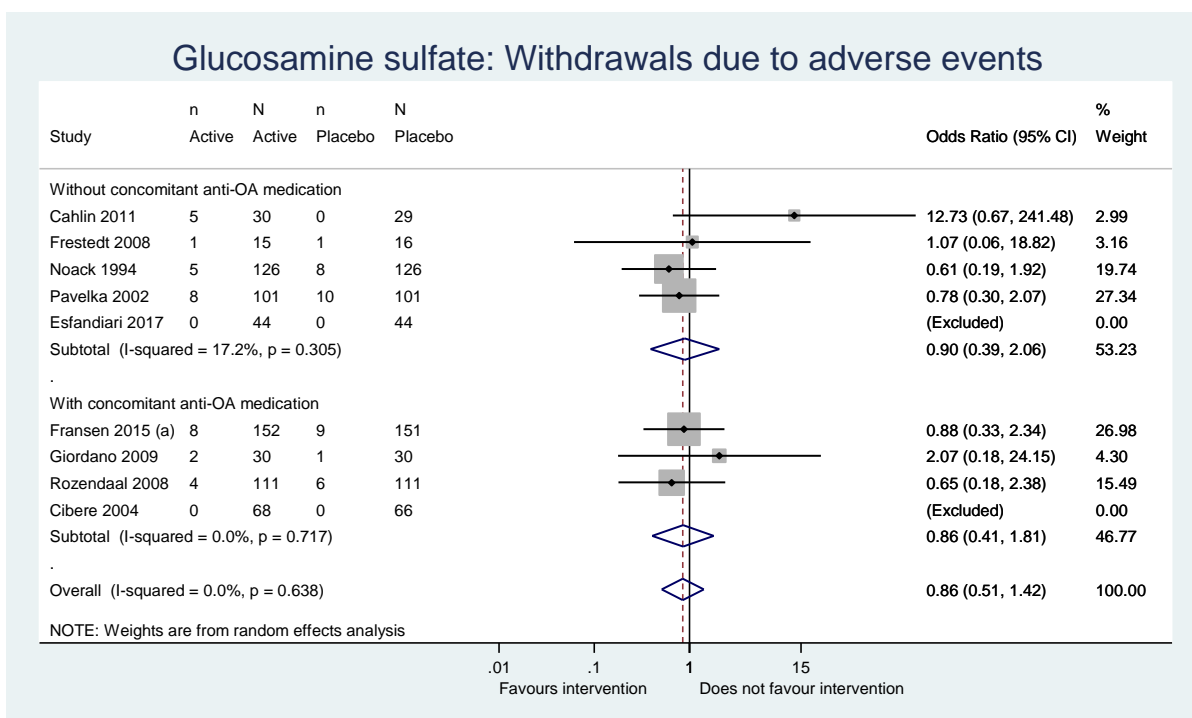

## B) Chondroitin sulfate

**Figure 23:** Forest plot displaying the results of the meta-analyses comparing gastrointestinal disorders with chondroitin sulfate versus placebo in patients with OA: Overall analysis and analyses of studies with and without concomitant anti-OA medication allowed

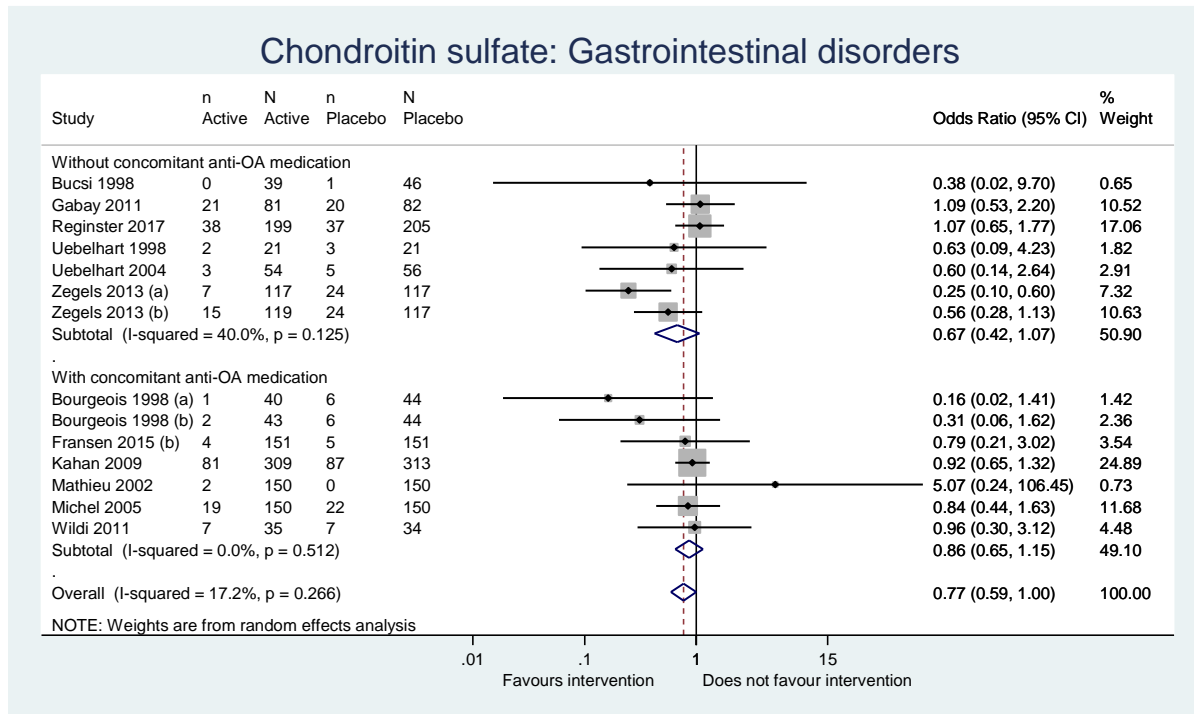

**Figure 24:** Forest plot displaying the results of the meta-analyses comparing cardiac disorders with chondroitin sulfate versus placebo in patients with OA: Overall analysis and analyses of studies with and without concomitant anti-OA medication allowed

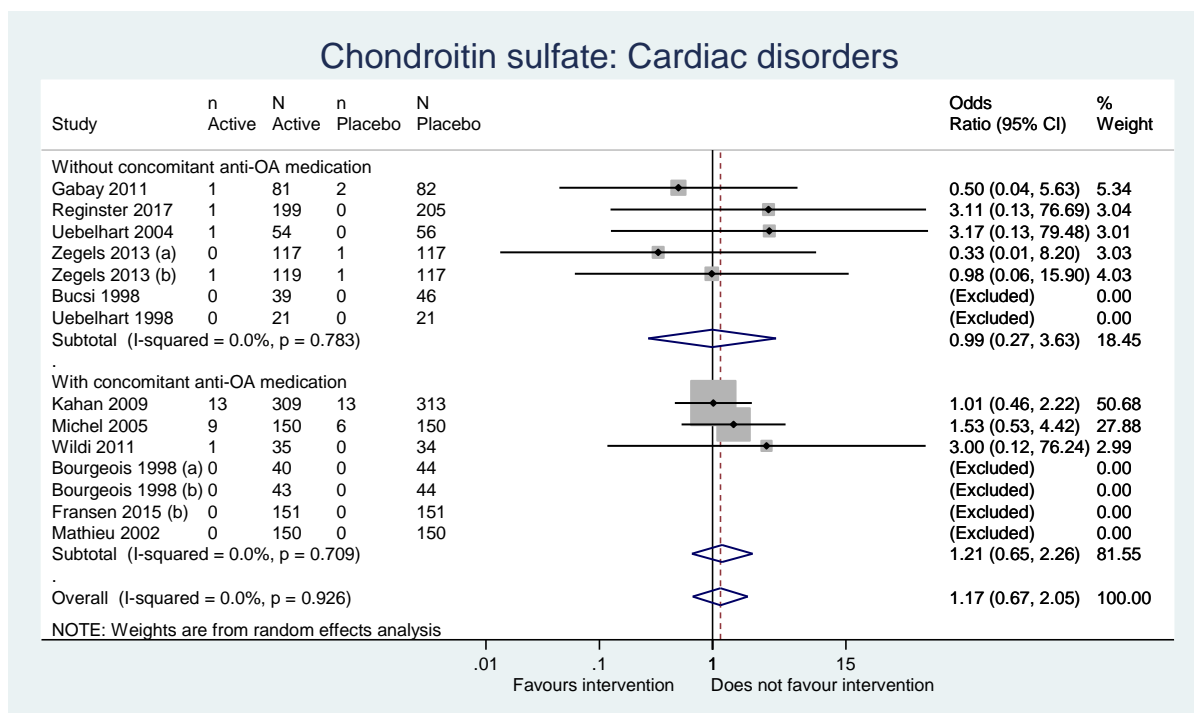



**Figure 25:** Forest plot displaying the results of the meta-analyses comparing vascular disorders with chondroitin sulfate versus placebo in patients with OA: Overall analysis and analyses of studies with and without concomitant anti-OA medication allowed

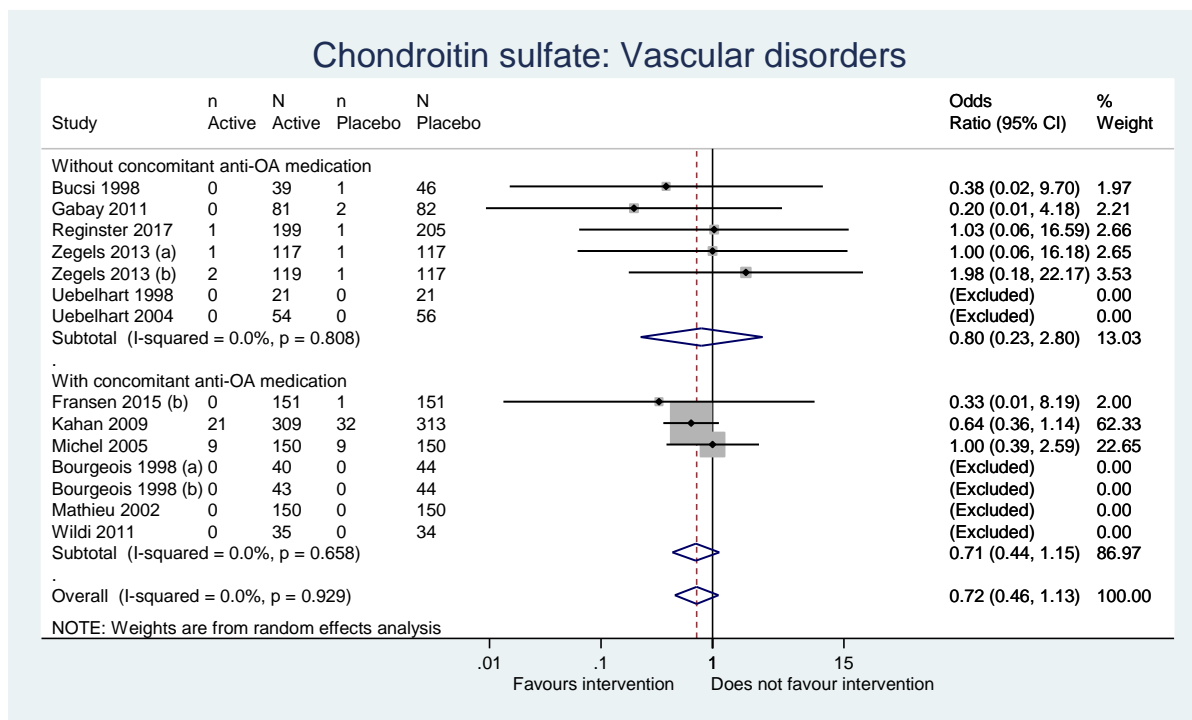

**Figure 26:** Forest plot displaying the results of the meta-analyses comparing nervous system disorders with chondroitin sulfate versus placebo in patients with OA: Overall analysis and analyses of studies with and without concomitant anti-OA medication allowed

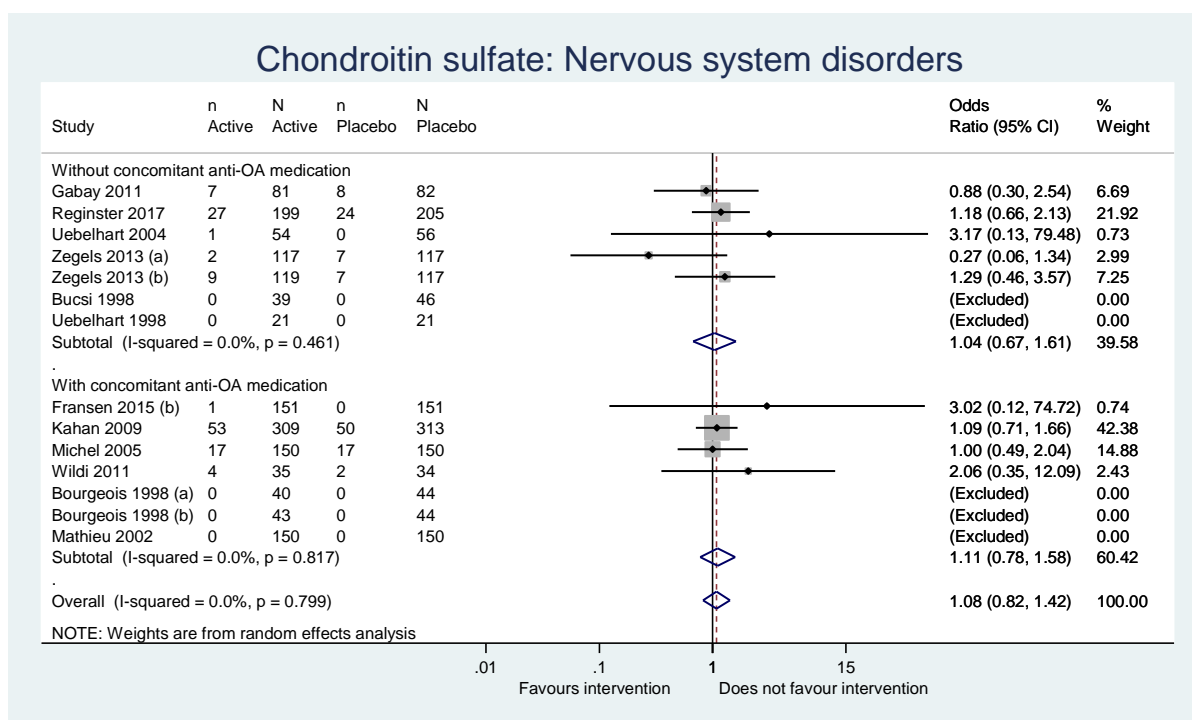

**Figure 27:** Forest plot displaying the results of the meta-analyses comparing dermatological disorders with chondroitin sulfate versus placebo in patients with OA: Overall analysis and analyses of studies with and without concomitant anti-OA medication allowed

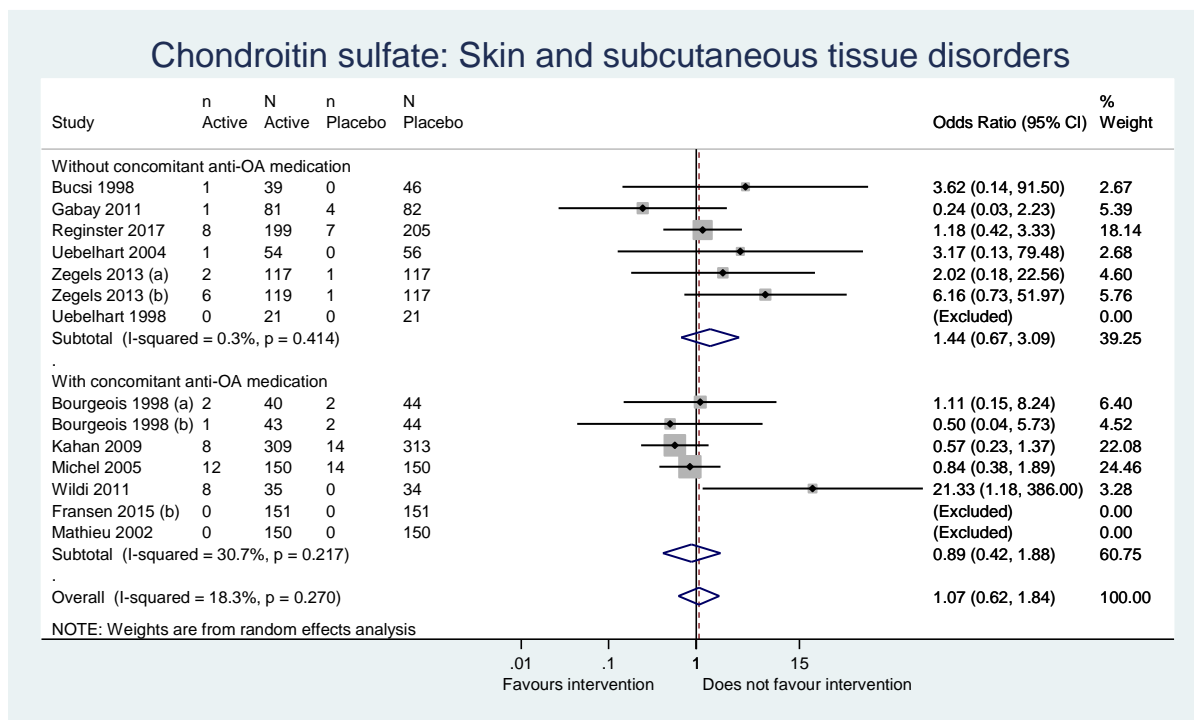

**Figure 28:** Forest plot displaying the results of the meta-analyses comparing musculoskeletal and connective tissue disorders with chondroitin sulfate versus placebo in patients with OA: Overall analysis and analyses of studies with and without concomitant anti-OA medication allowed

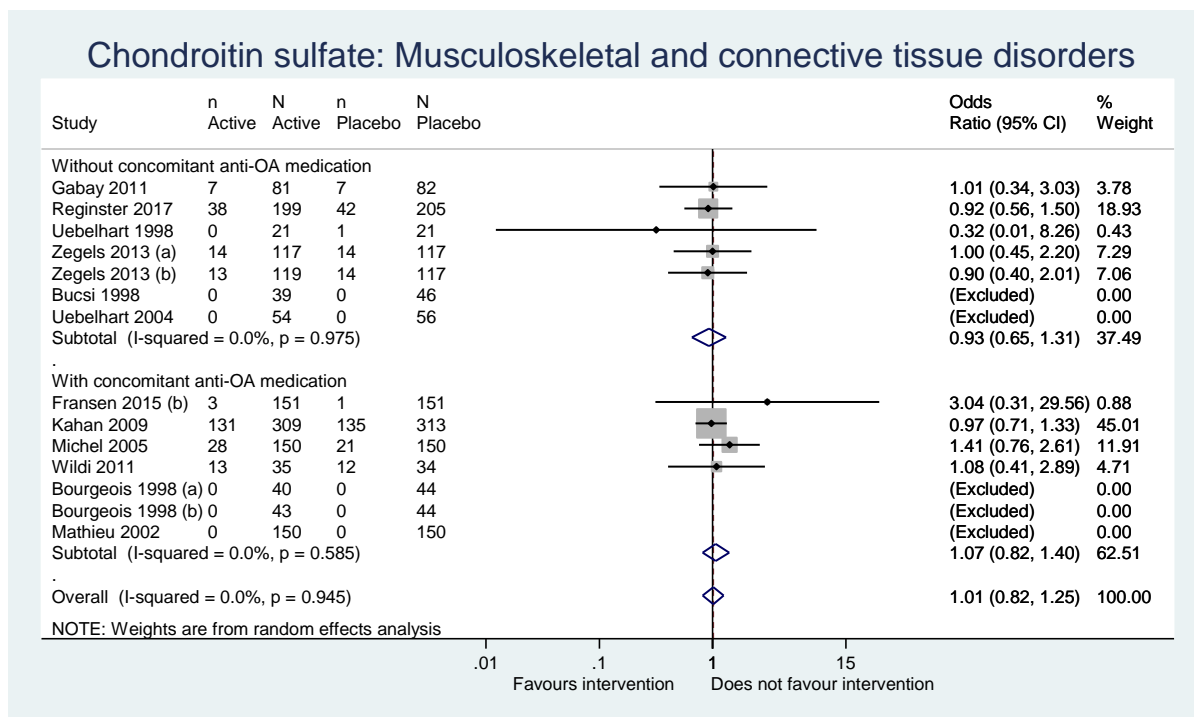

**Figure 29:** Forest plot displaying the results of the meta-analyses comparing renal and urinary disorders with chondroitin sulfate versus placebo in patients with OA: Overall analysis and analyses of studies with and without concomitant anti-OA medication allowed

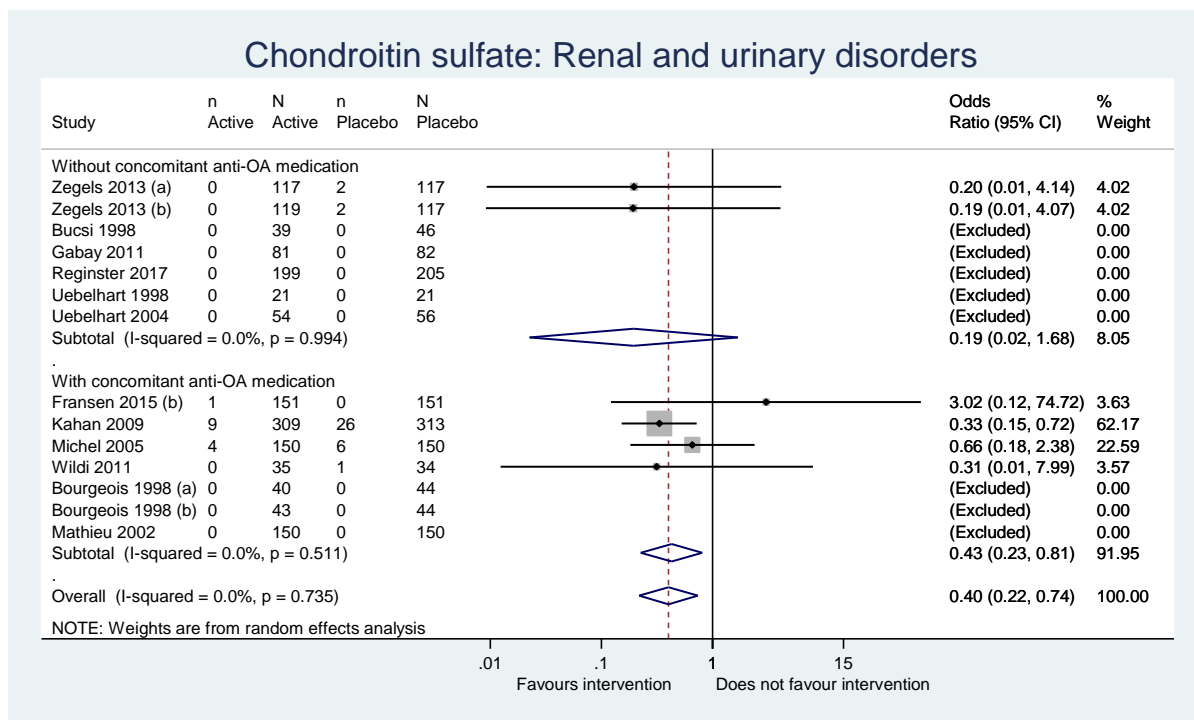

**Figure 30:** Forest plot displaying the results of the meta-analyses comparing severe adverse events with chondroitin sulfate versus placebo in patients with OA: Overall analysis and analyses of studies with and without concomitant anti-OA medication allowed

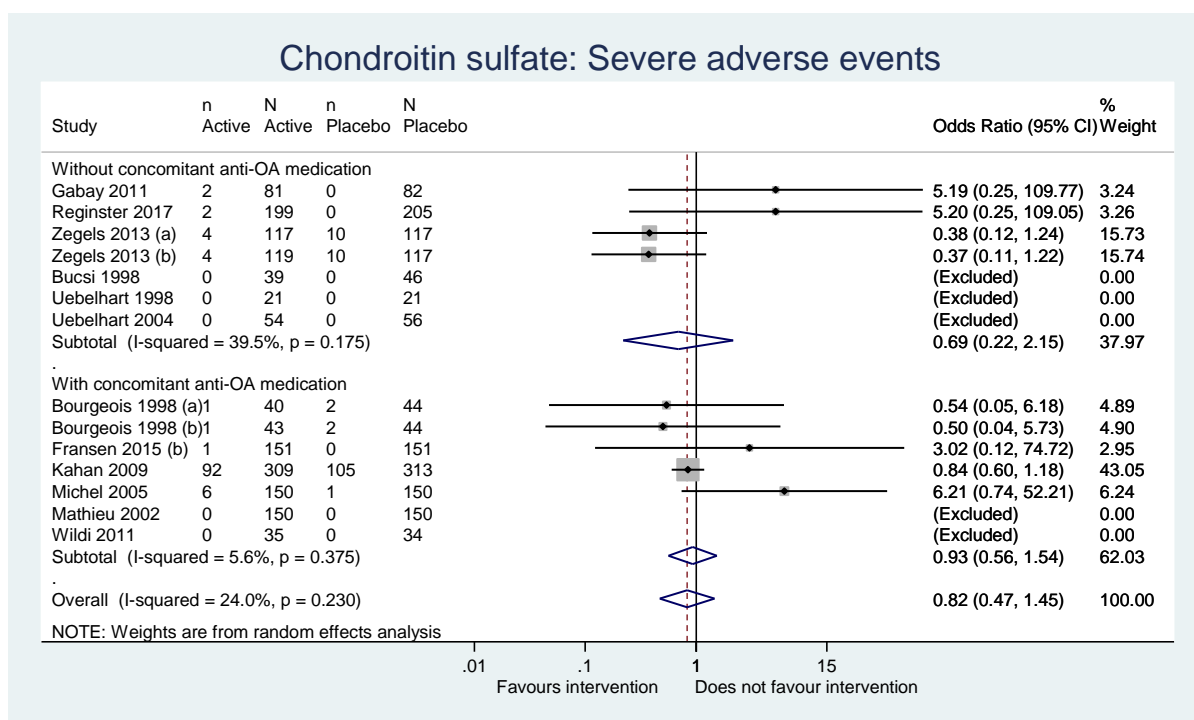

**Figure 31:** Forest plot displaying the results of the meta-analyses comparing serious adverse events with chondroitin sulfate versus placebo in patients with OA: Overall analysis and analyses of studies with and without concomitant anti-OA medication allowed

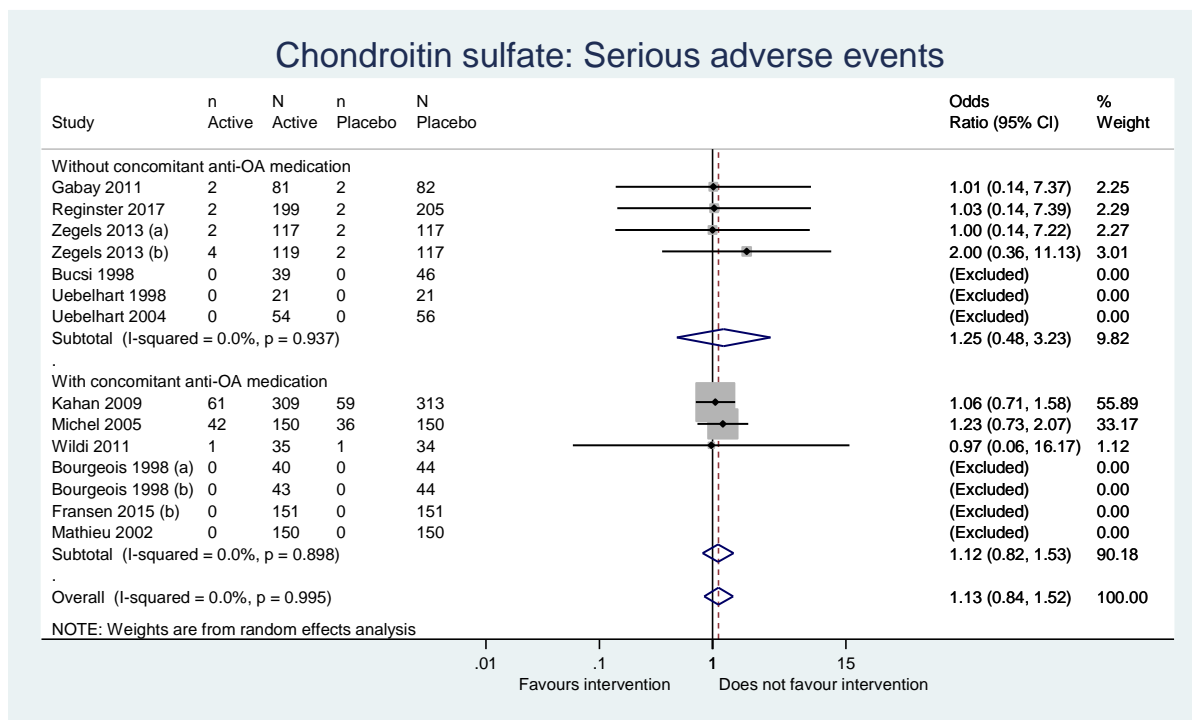

**Figure 32:** Forest plot displaying the results of the meta-analyses comparing dropouts due to adverse events with chondroitin sulfate versus placebo in patients with OA: Overall analysis and analyses of studies with and without concomitant anti-OA medication allowed

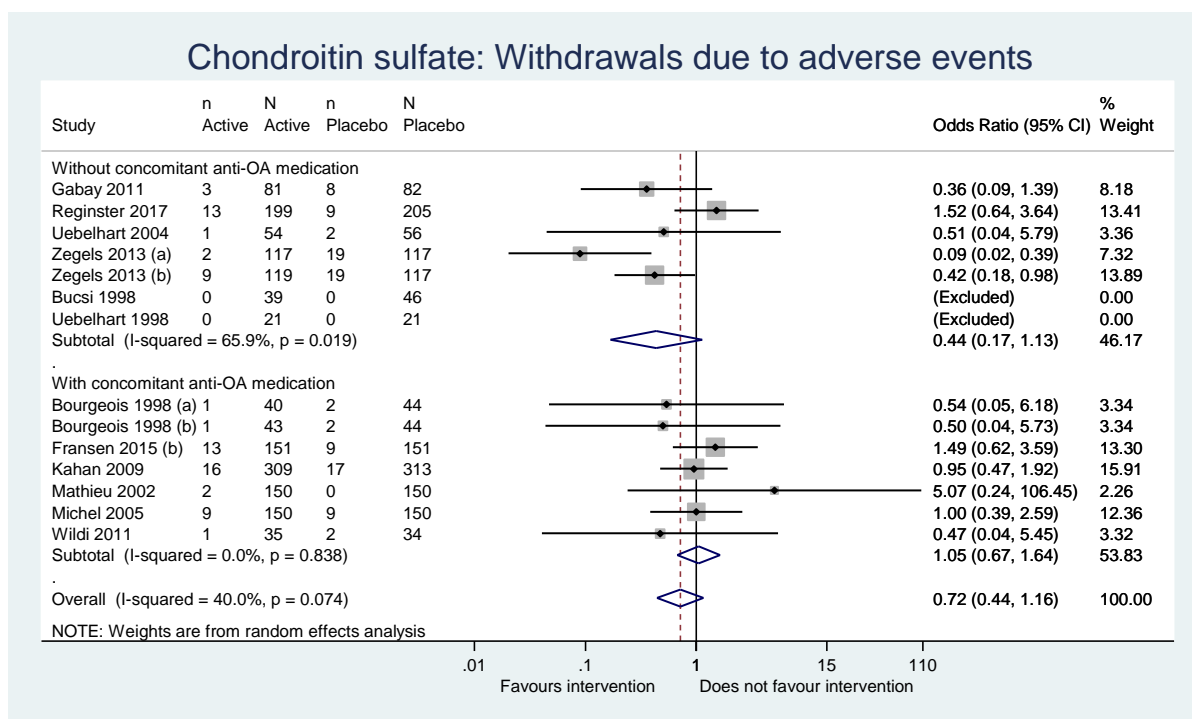

### C) Avocado soybean unsaponifiables

**Figure 33:** Forest plot displaying the result of the meta-analysis comparing gastrointestinal disorders with avocado soybean unsaponifiables versus placebo in patients with OA: Analysis of studies with concomitant anti-OA medications allowed

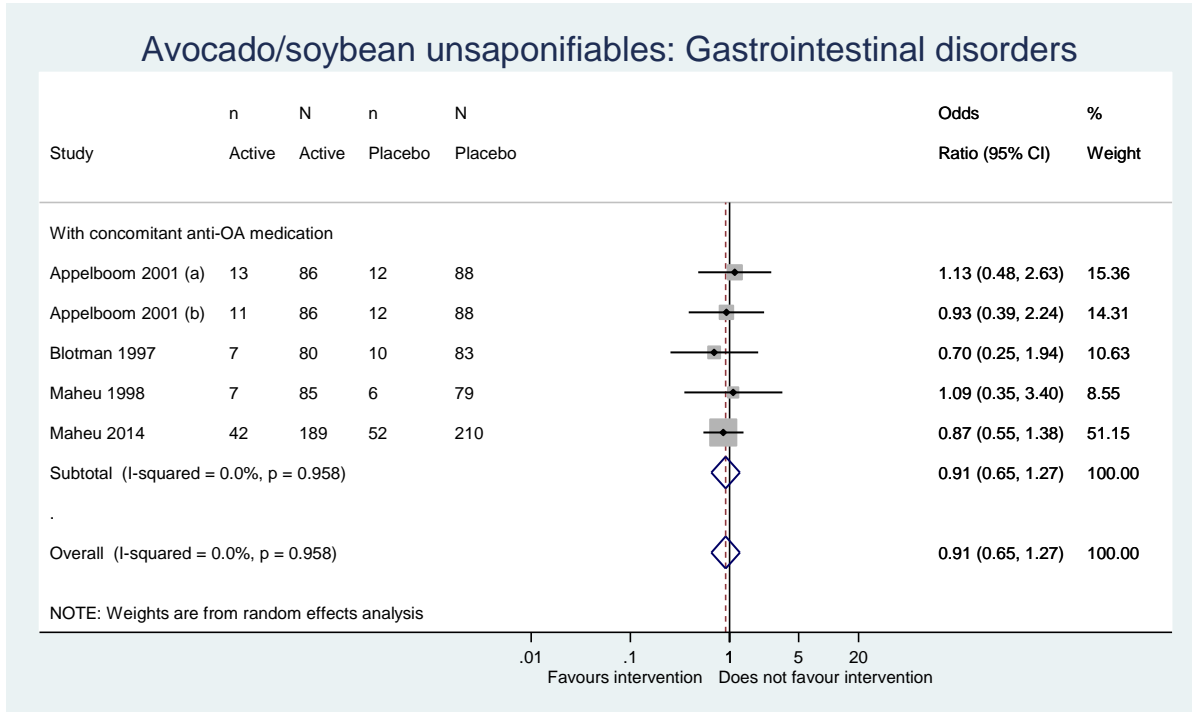

**Figure 34:** Forest plot displaying the result of the meta-analysis comparing cardiac disorders with avocado soybean unsaponifiables versus placebo in patients with OA: Analysis of studies with concomitant anti-OA medications allowed

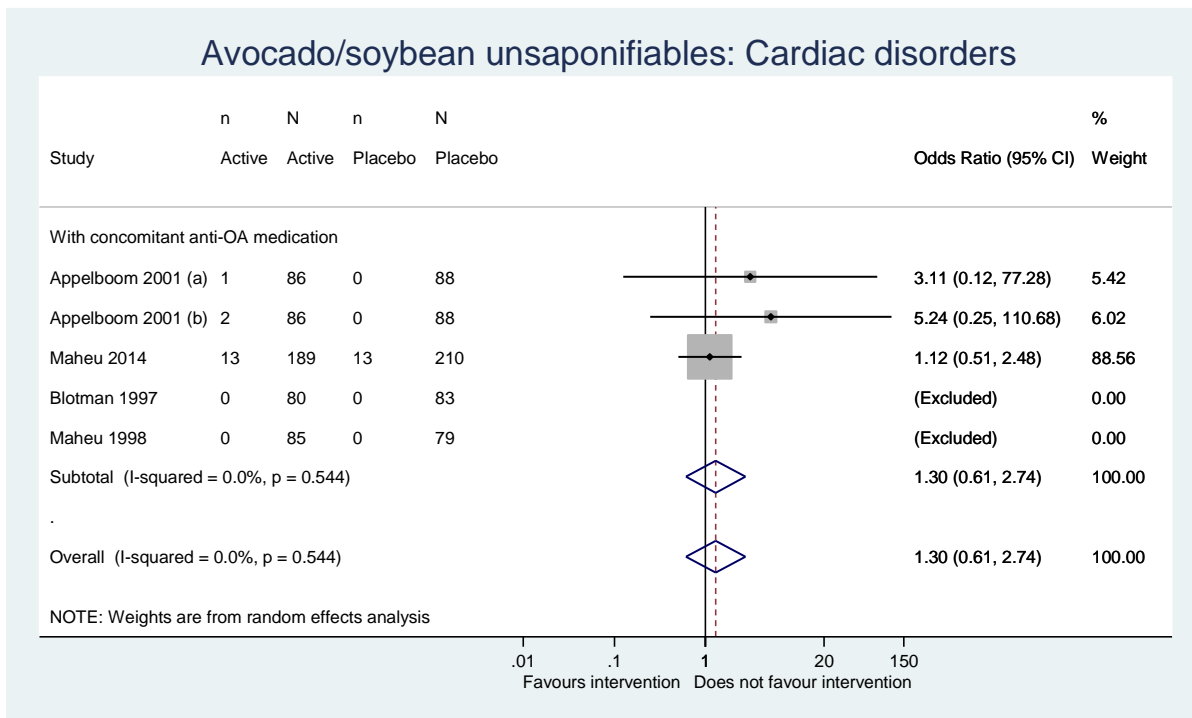

**Figure 35:** Forest plot displaying the result of the meta-analysis comparing vascular disorders with avocado soybean unsaponifiables versus placebo in patients with OA: Analysis of studies with concomitant anti-OA medications allowed

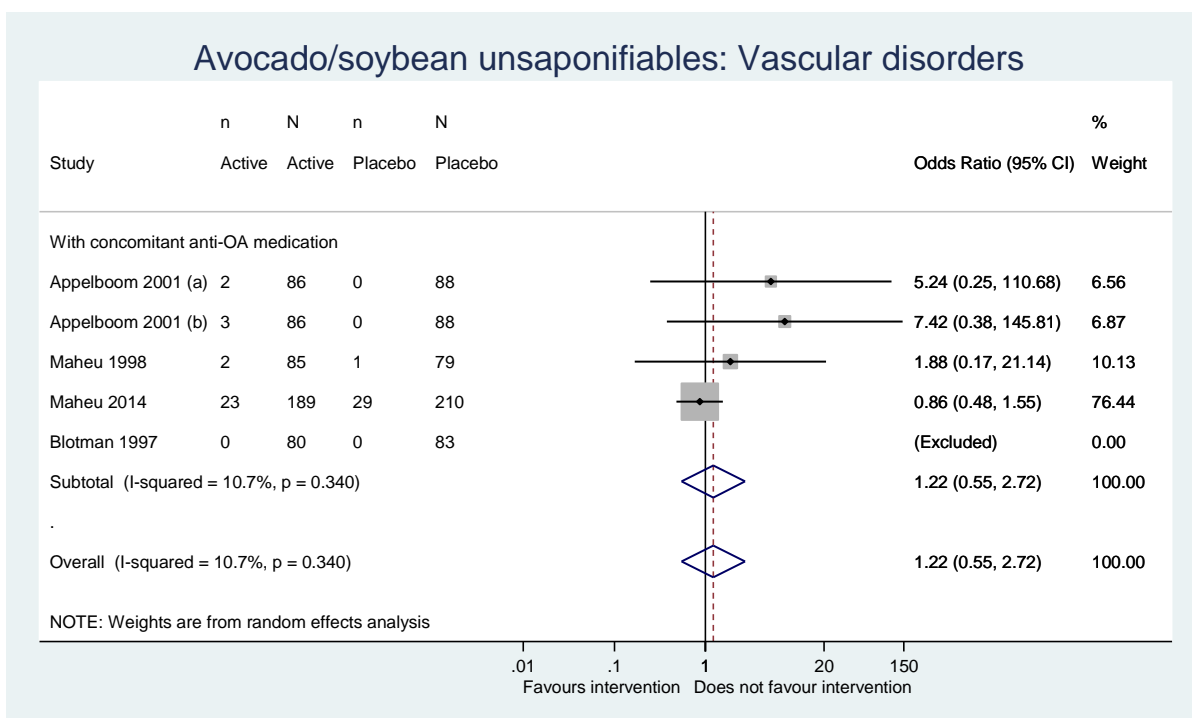

**Figure 36:** Forest plot displaying the result of the meta-analysis comparing nervous system disorders with avocado soybean unsaponifiables versus placebo in patients with OA: Analysis of studies with concomitant anti-OA medications allowed

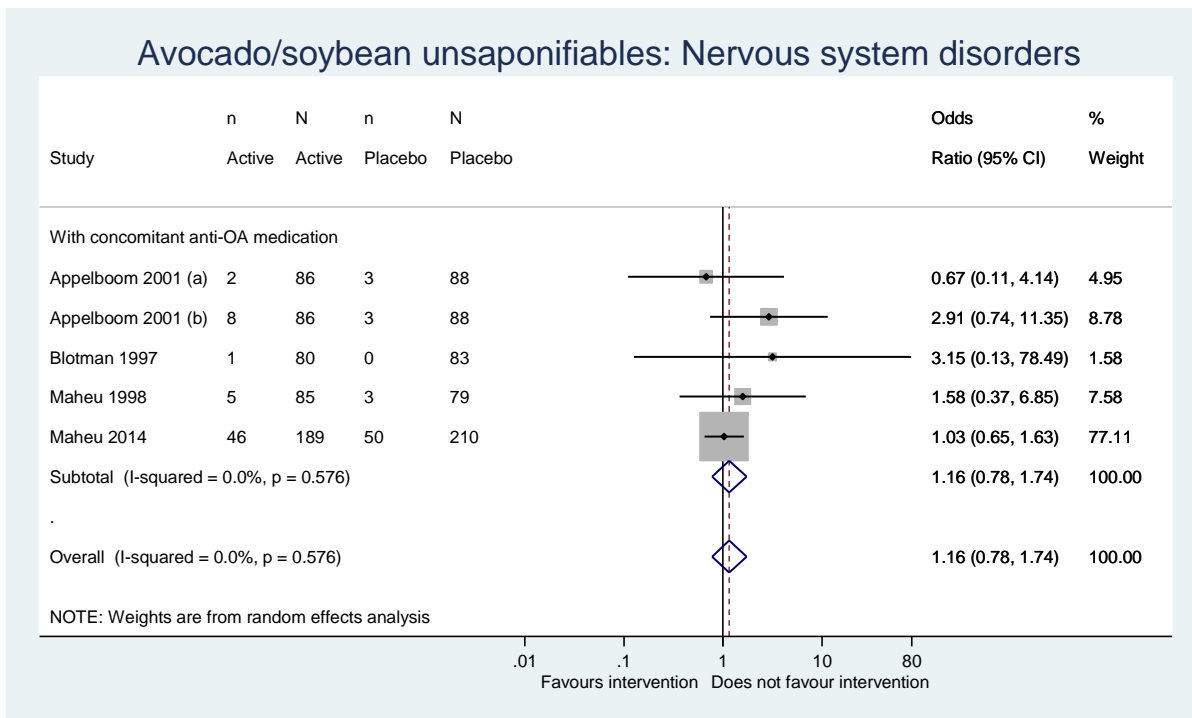

**Figure 37:** Forest plot displaying the result of the meta-analysis comparing skin and subcutaneous tissue disorders with avocado soybean unsaponifiables versus placebo in patients with OA: Analysis of studies with concomitant anti-OA medications allowed

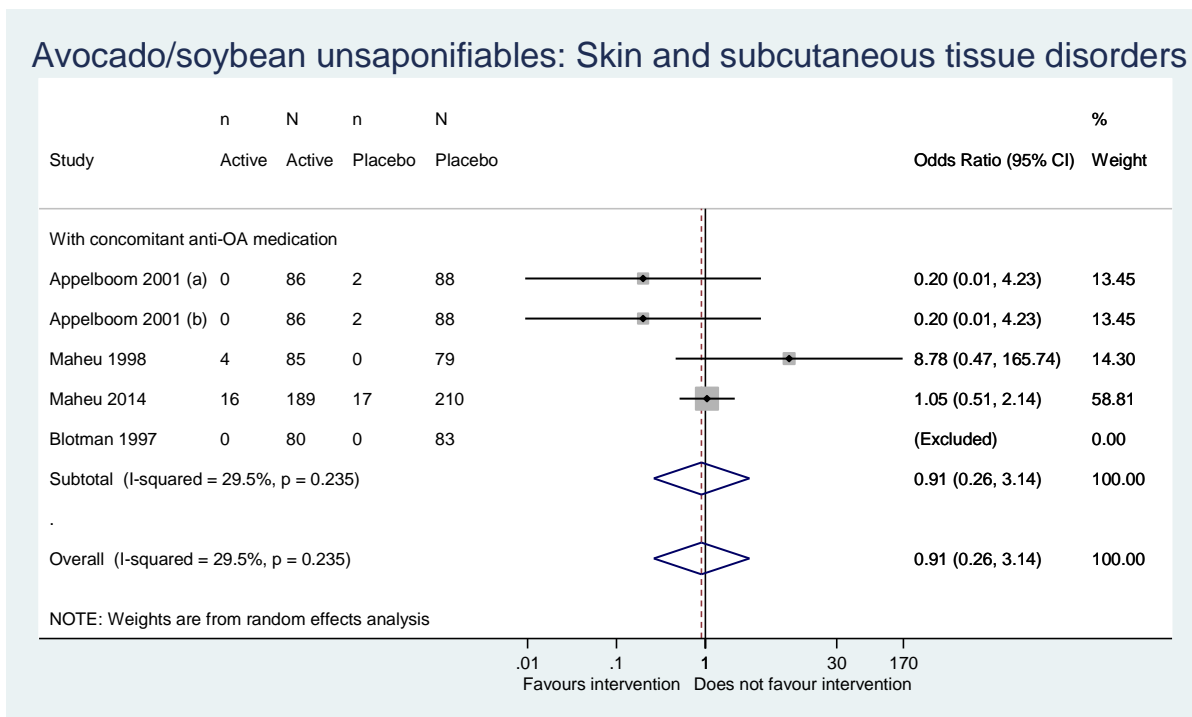

**Figure 38:** Forest plot displaying the result of the meta-analysis comparing musculoskeletal and connective tissue disorders with avocado soybean unsaponifiables versus placebo in patients with OA: Analysis of studies with concomitant anti-OA medications allowed

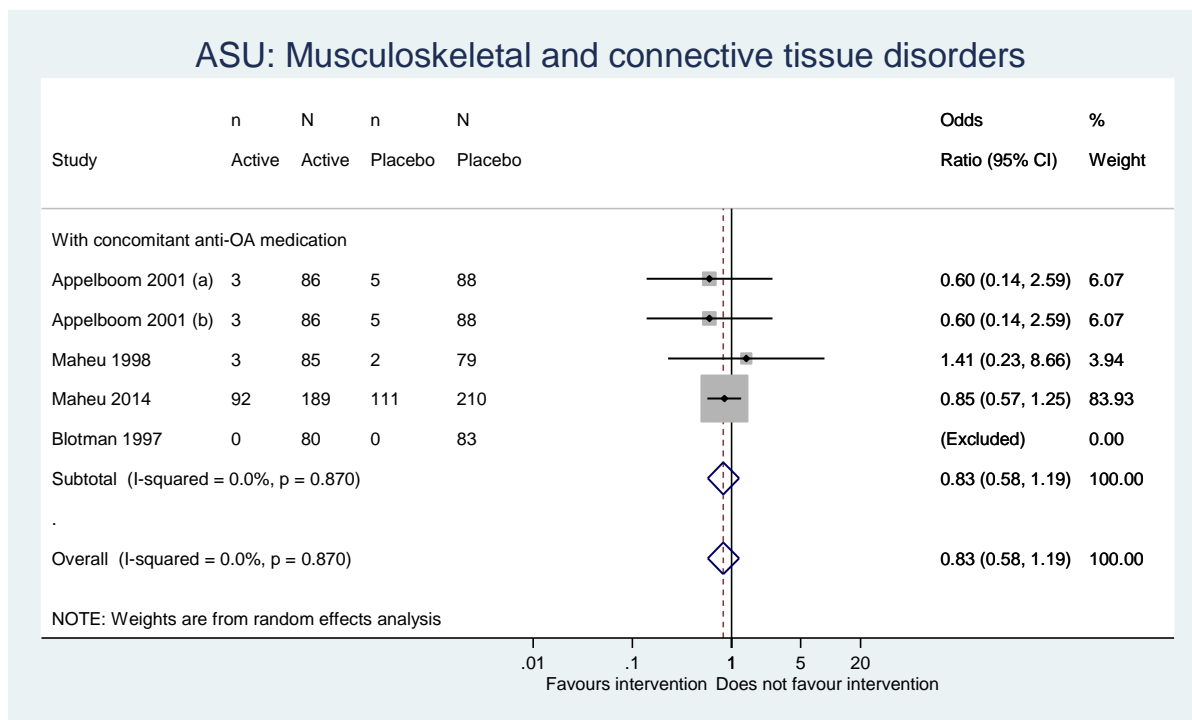

**Figure 39:** Forest plot displaying the result of the meta-analysis comparing renal and urinary disorders with avocado soybean unsaponifiables versus placebo in patients with OA: Analysis of studies with concomitant anti-OA medications allowed

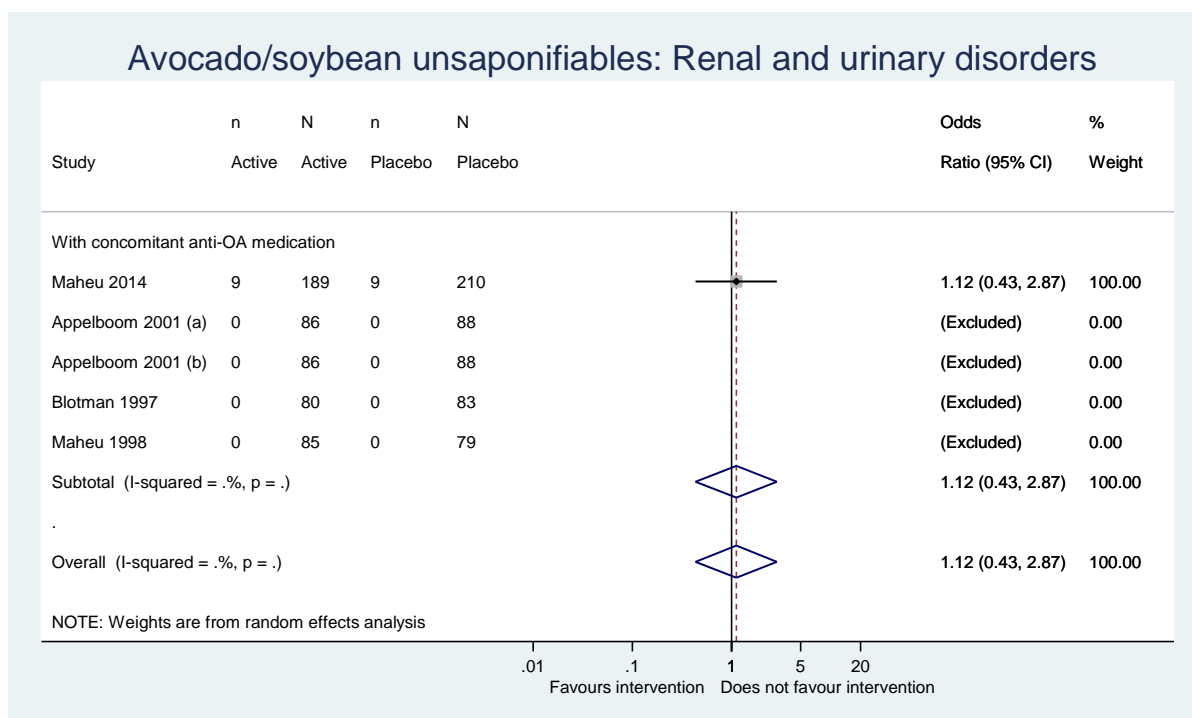



**Figure 40:** Forest plot displaying the result of the meta-analysis comparing severe adverse events with avocado soybean unsaponifiables versus placebo in patients with OA: Analysis of studies with concomitant anti-OA medications allowed

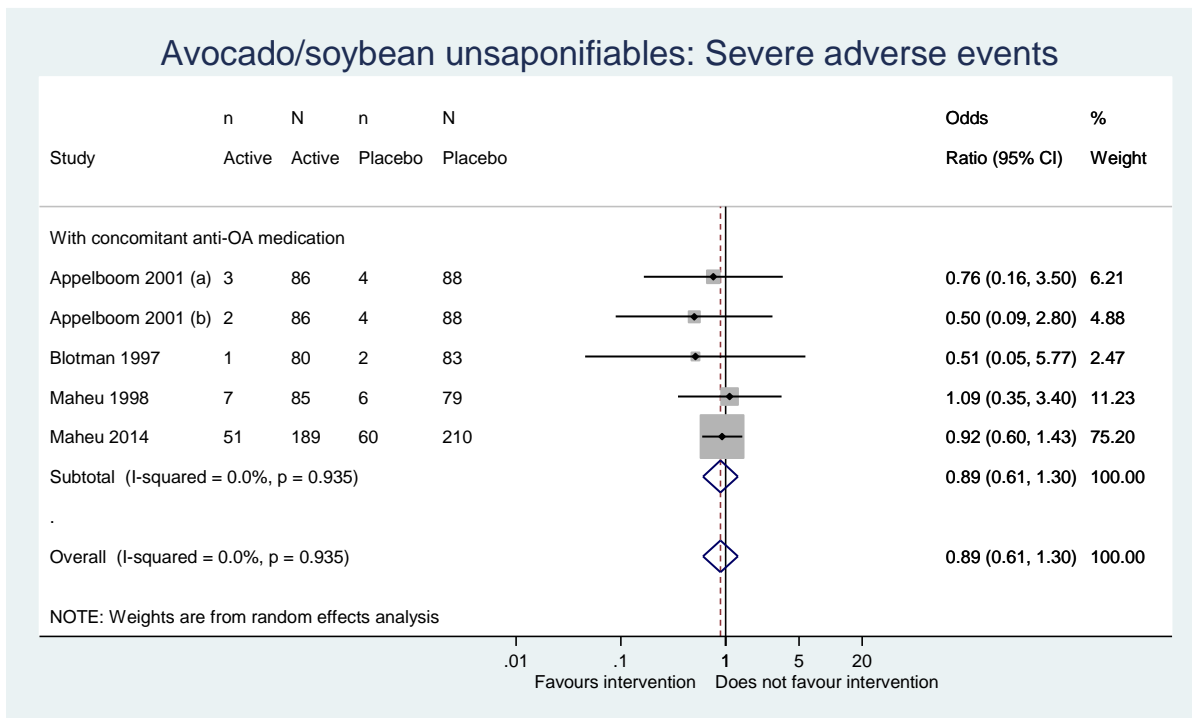

**Figure 41:** Forest plot displaying the result of the meta-analysis comparing serious adverse events with avocado soybean unsaponifiables versus placebo in patients with OA: Analysis of studies with concomitant anti-OA medications allowed

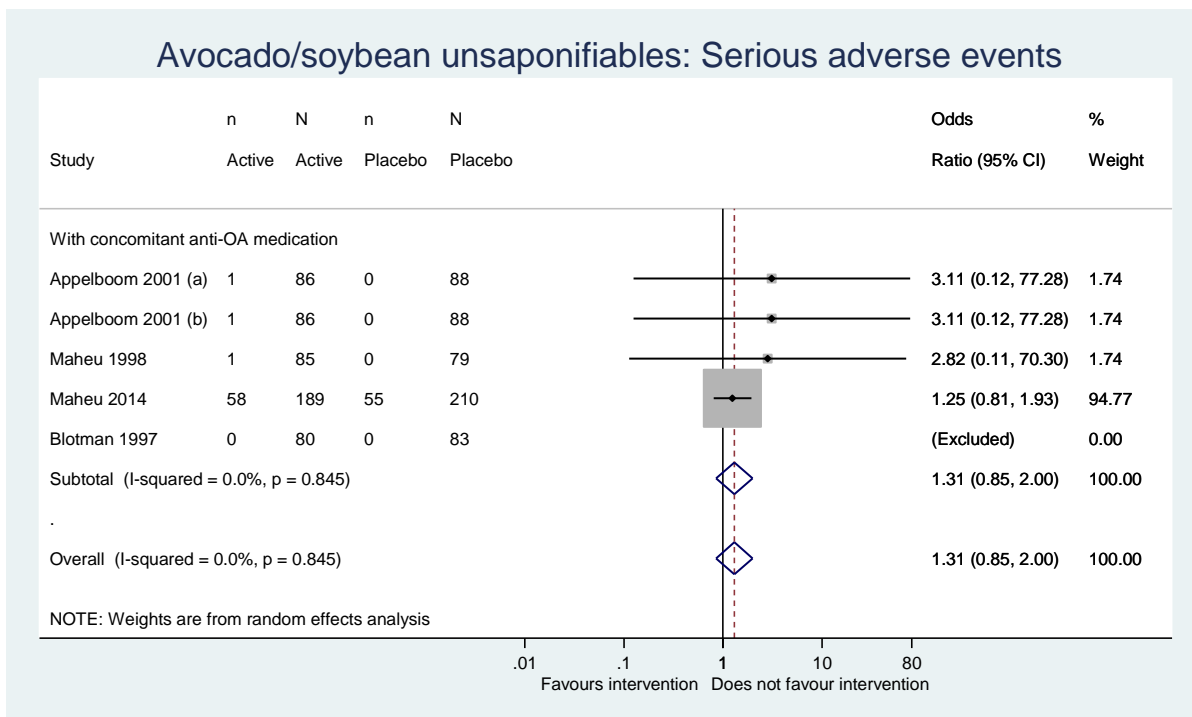

**Figure 42:** Forest plot displaying the result of the meta-analysis comparing dropouts due to adverse events with avocado soybean unsaponifiables versus placebo in patients with OA: Analysis of studies with concomitant anti-OA medications allowed

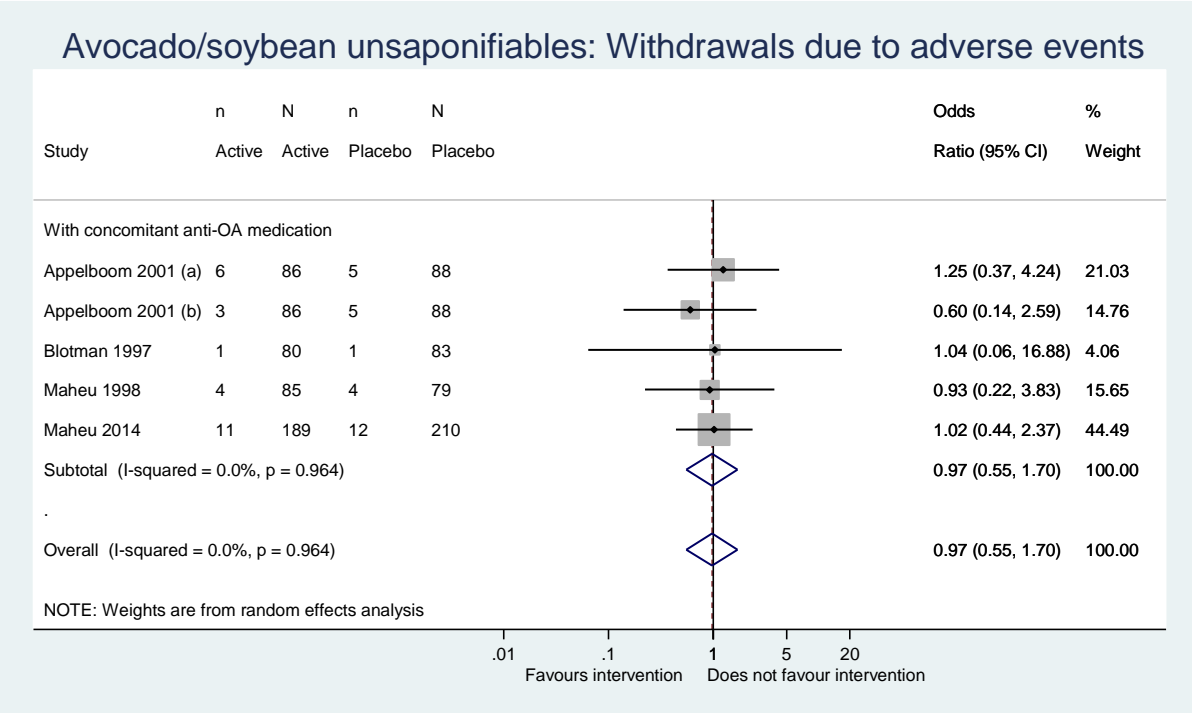

## D) Diacerein

**Figure 43:** Forest plot displaying the results of the meta-analyses comparing cardiac disorders with diacerein versus placebo in patients with OA: Overall analysis and analyses of studies with and without concomitant anti-OA medication allowed

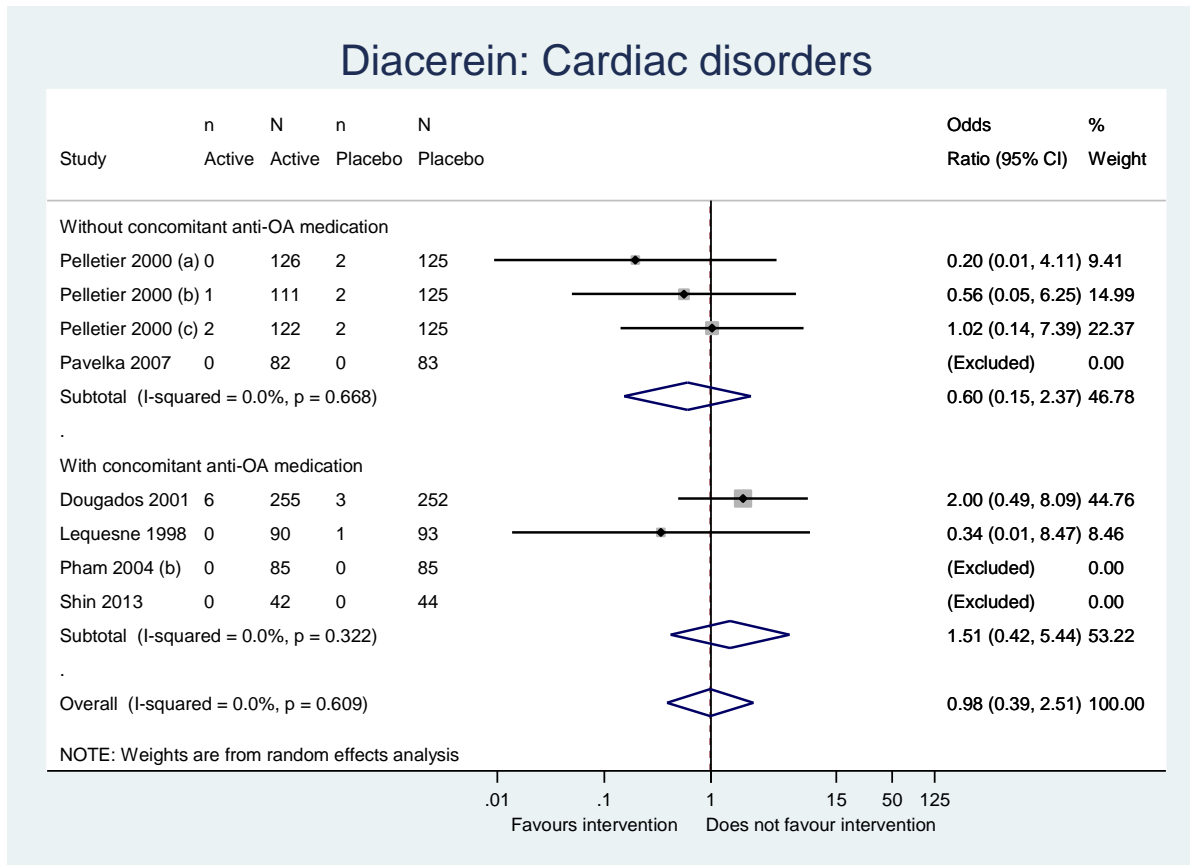

**Figure 44:** Forest plot displaying the results of the meta-analyses comparing vascular disorders with diacerein versus placebo in patients with OA: Overall analysis and analyses of studies with and without concomitant anti-OA medication allowed

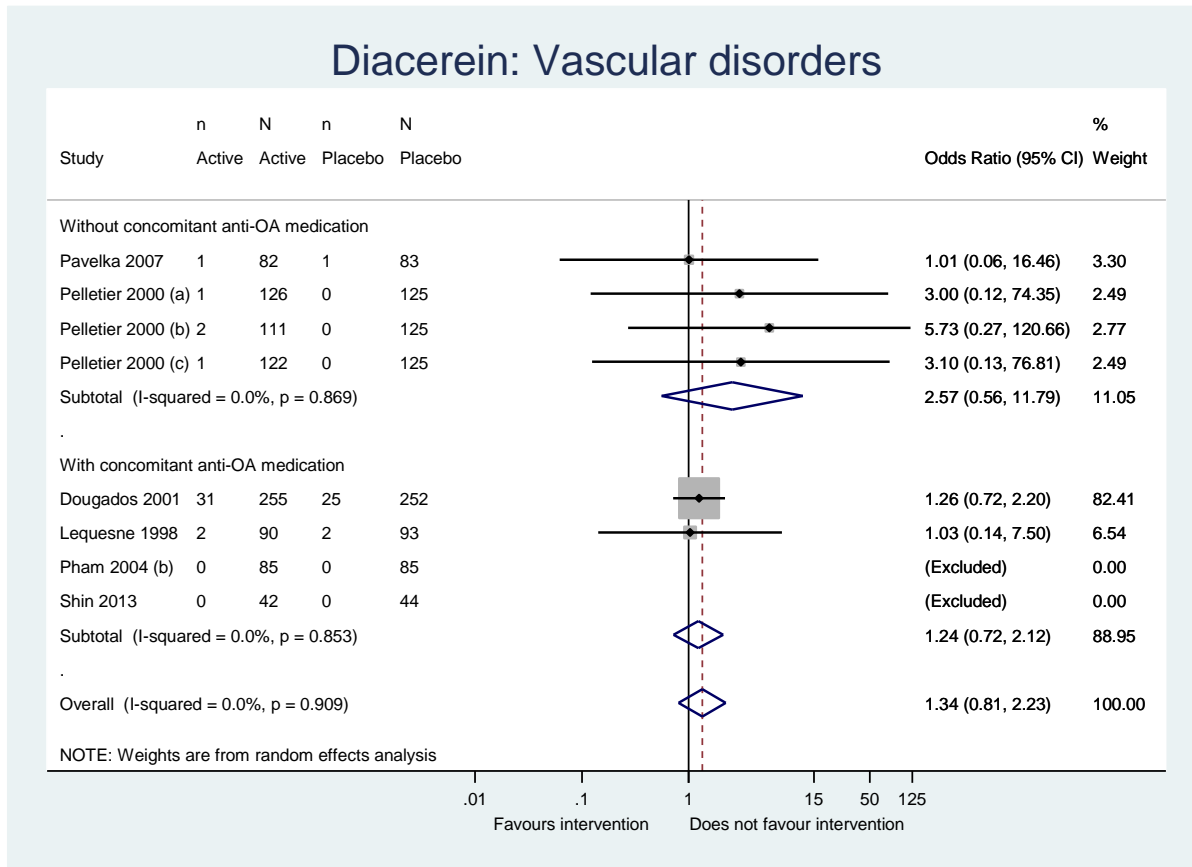

**Figure 45:** Forest plot displaying the results of the meta-analyses comparing musculoskeletal and connective tissue disorders with diacerein versus placebo in patients with OA: Overall analysis and analyses of studies with and without concomitant anti-OA medication allowed

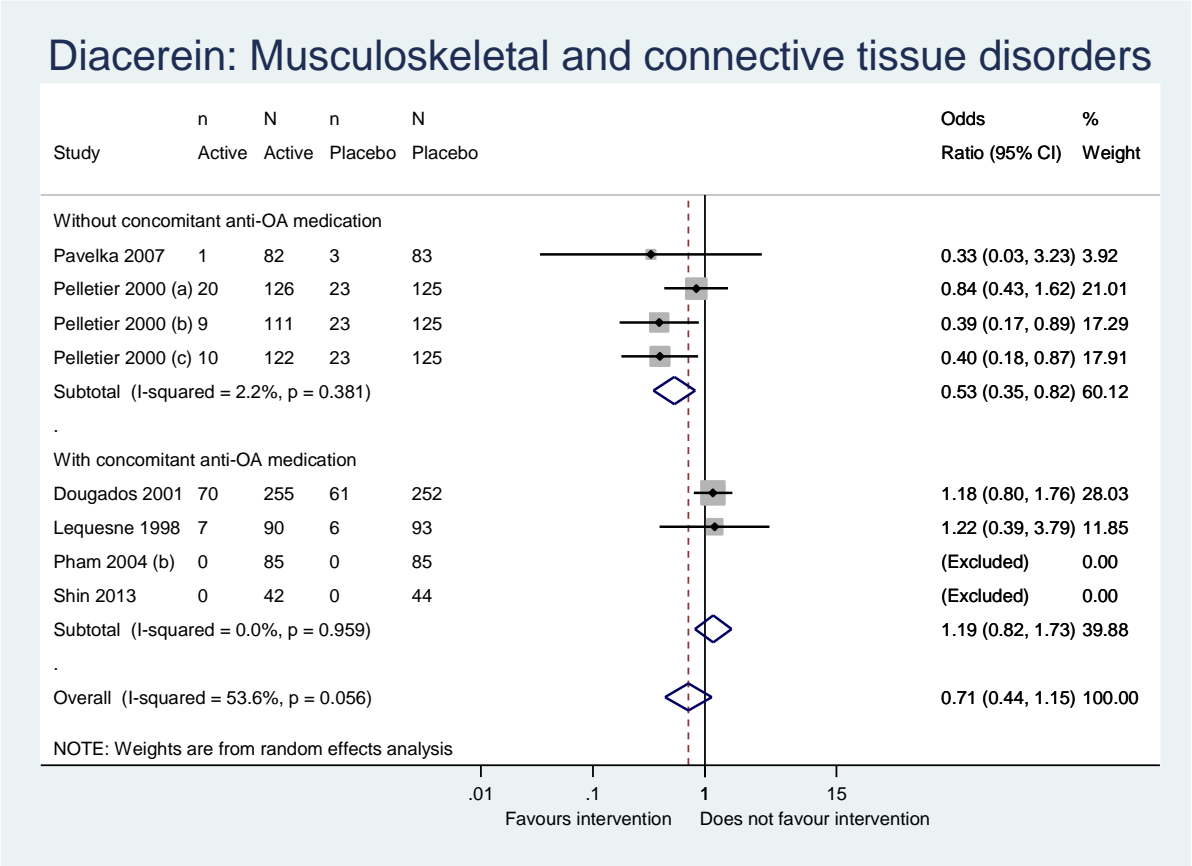

**Figure 46:** Forest plot displaying the results of the meta-analyses comparing severe adverse events with diacerein versus placebo in patients with OA: Overall analysis and analyses of studies with and without concomitant anti-OA medication allowed

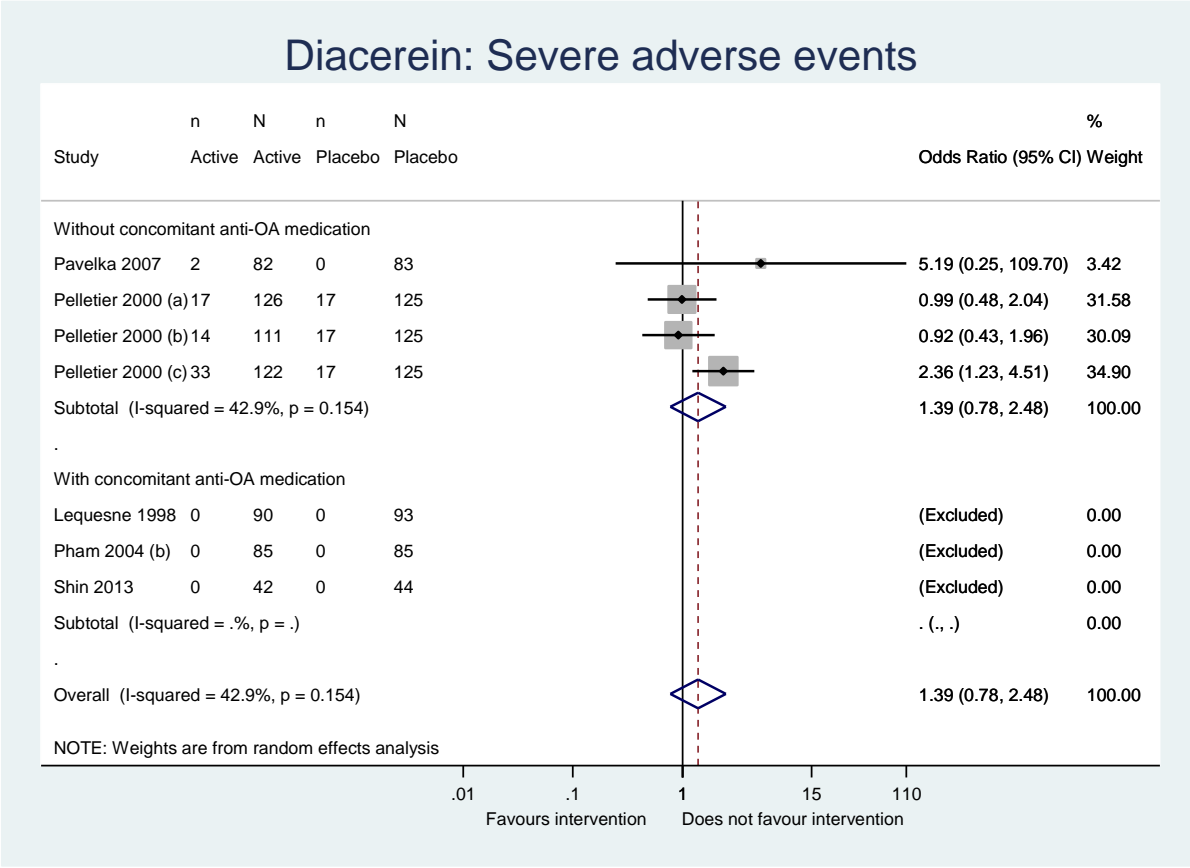

**Figure 47:** Forest plot displaying the results of the meta-analyses comparing serious adverse events with diacerein versus placebo in patients with OA: Overall analysis and analyses of studies with and without concomitant anti-OA medication allowed

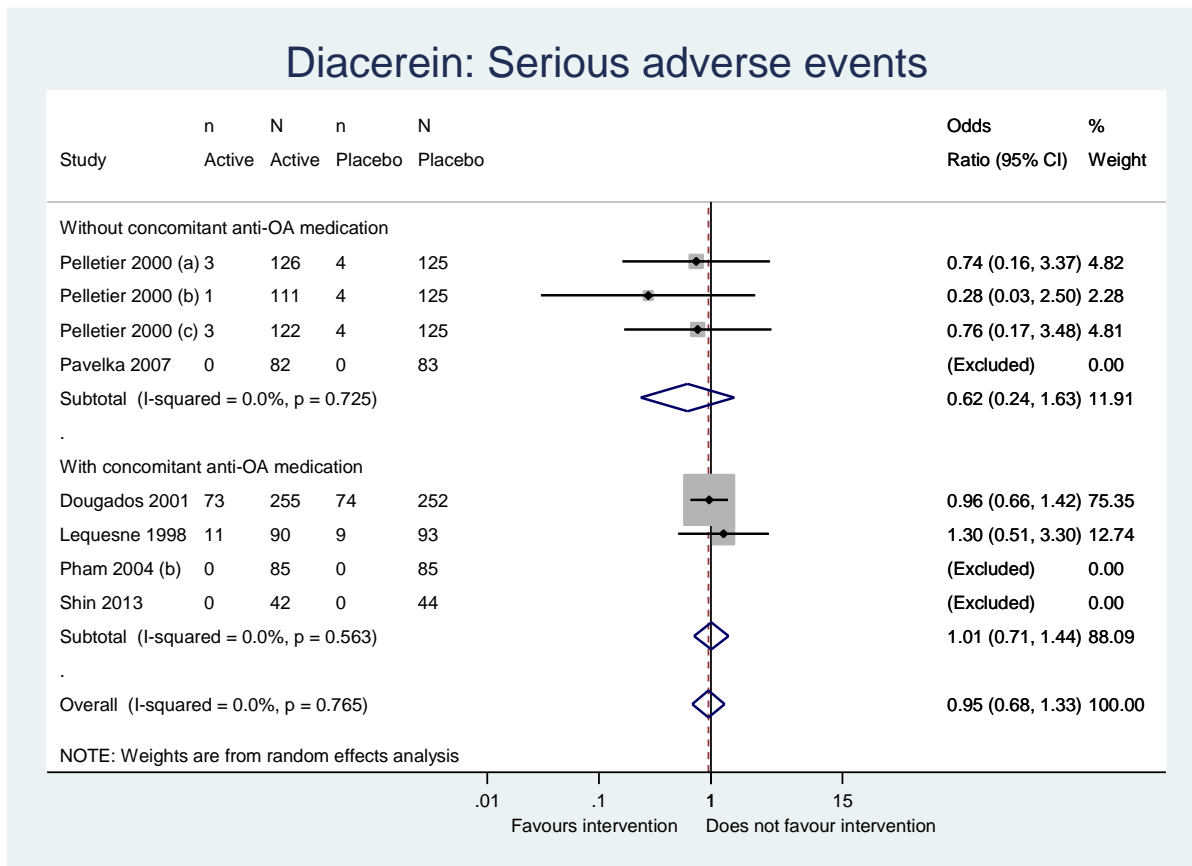

Supplement: 40266_2019_662_MOESM2_ESM.pdf [file 40266_2019_662_MOESM2_ESM.pdf]
