# Supplementary material for: Safety of Symptomatic Slow-Acting Drugs for Osteoarthritis: Outcomes of a Systematic Review and Meta-Analysis
Source: PubMed Central journal article supplement — Drugs Aging. 2019 May 9;36(Suppl 1):65–99. doi: 10.1007/s40266-019-00662-z (PMC6509099; doi:10.1007/s40266-019-00662-z), 2019-05-09
Supplement: 40266_2019_662_MOESM1_ESM.pdf [file 40266_2019_662_MOESM1_ESM.pdf]

**Drugs and Aging, 2019**

**Supplement: Safety of Anti-Osteoarthritis Medications**

**Safety of symptomatic slow-acting drugs in osteoarthritis: outcomes of a systematic review and meta-analysis**

Germain Honvo, Jean-Yves Reginster, Véronique Rabenda, Anton Geerinck, Ouafa Mkinsi, Alexia Charles, Rene Rizzoli, Cyrus Cooper, Bernard Avouac, Olivier Bruyère

**ELECTRONIC SUPPLEMENTARY MATERIAL 1**

**Databases:** Ovid MEDLINE(R) Epub Ahead of Print, In-Process & Other Non-Indexed Citations, Ovid MEDLINE(R) Daily and Ovid MEDLINE(R)

& Cochrane Central Register of Controlled Trials, via Ovid (Ovid CENTRAL)

**Search Strategy:**

1. exp Osteoarthritis/
2. (degenerative adj (arthritis OR joint\*1 OR arthritides)).ti,ab,kw.
3. (osteoarthr\* OR arthros\* OR coxarthros\* OR gonarthros\* OR joint failure\*1 OR osteoarthritis OR OA).ti,ab,kw.
4. 1 OR 2 OR 3
5. exp Glucosamine/
6. Chondroitin Sulfates/
7. Hyaluronic Acid/
8. exp Collagen/
9. Gelatin/
10. Curcuma/
11. Curcumin/
12. ("Symptomatic Slow-Acting Drug\*1" OR SYSADOA\*1 OR Chondroprotector\*1).ti,ab,kw.
13. (("Cartilage protect\*" OR Chondroprotect\*) adj2 (Agent\*1 OR Action\*1 OR Treatment\*1 OR Effect\*1 OR Propert\*)).ti,ab,kw.
14. (Glucosamine OR Chondroitin OR "Hyaluronic Acid" OR Collagen\*1 OR Gelatin\*1 OR Curcuma\*1 OR Curcumin OR "Avocado/soybean unsaponifiable\*1" OR Diacerein\*1).ti,ab,kw.
15. (Acetylglucosamine OR Chondroitinsulfate OR Hyaluronan OR Hyaluronate OR Procollagen OR Curcumin\* OR Diferuloylmethane OR Tumeric\*1 OR Turmeric\*1 OR Diacetylrhein OR Diacetyl-rhein OR Diacerhein).ti,ab,kw.
16. 5 OR 6 OR 7 OR 8 OR 9 OR 10 OR 11 OR 12 OR 13 OR 14 OR 15
17. Randomized controlled trial.pt.
18. Controlled clinical trial.pt.
19. Randomized Controlled Trials as Topic/
20. Controlled Clinical Trials as Topic/
21. ("Randomized controlled trial\*" OR "Randomized clinical trial\*" OR "Controlled clinical trial\*" OR Placebo-controlled OR Sham-controlled OR Saline-controlled OR Vehicle-controlled OR "Randomized double-blind" OR Random\* OR Placebo OR RCT).ti,ab,kw.
22. 17 OR 18 OR 19 OR 20 OR 21
23. 4 AND 16 AND 22

**Database:** SCOPUS

**Search Strategy:**

(TITLE-ABS-KEY (osteoarthr\* OR arthrosis OR coxarthros\* OR gonarthros\* OR "joint failure\*" OR osteo-arthritis OR OA)  
OR

TITLE-ABS-KEY (degenerative W/0 (arthritis OR joint\* OR arthritides ))  
)

**AND**

(TITLE-ABS-KEY ("Symptomatic Slow-Acting Drug\*" OR SYSADOA\* OR Chondroprotector\*)  
OR

TITLE-ABS-KEY (({Cartilage protect\*} OR Chondroprotect\*) W/2 (Agent\* OR Action\*1 OR Treatment\*  
OR Effect\* OR Propert\*))  
OR

TITLE-ABS-KEY (Glucosamine OR Chondroitin OR {Hyaluronic Acid} OR Collagen\* OR Gelatin\* OR  
Curcuma\* OR Curcumin OR "Avocado/soybean unsaponifiable\*" OR Diacerein\*)  
OR

TITLE-ABS-KEY (Acetylglucosamine OR Chondroitinsulfate OR Hyaluronan OR Hyaluronate OR  
Procollagen OR Curcumin\* OR Diferuloylmethane OR Tumeric\*1 OR Turmeric\*1 OR Diacetylrhein OR  
Diacetyl-rhein OR Diacerhein)  
)

**AND**

(TITLE-ABS-KEY ("Randomized controlled trial\*" OR "Randomized clinical trial\*" OR "Controlled  
clinical trial\*" OR Placebo-controlled OR Sham-controlled OR Saline-controlled OR Vehicle-controlled  
OR "Randomized double-blind" OR Random\* OR Placebo OR RCT)  
)

**AND**

(LIMIT-TO (DOCTYPE,"ar")  
OR LIMIT-TO (DOCTYPE,"ip"))
