# Supplementary material for: Safety of Symptomatic Slow-Acting Drugs for Osteoarthritis: Outcomes of a Systematic Review and Meta-Analysis
Source: PubMed Central journal article supplement — Drugs Aging. 2019 May 9;36(Suppl 1):65–99. doi: 10.1007/s40266-019-00662-z (PMC6509099; doi:10.1007/s40266-019-00662-z), 2019-05-09
Supplement: 40266_2019_662_MOESM3_ESM.pdf [file 40266_2019_662_MOESM3_ESM.pdf]

**Drugs and Aging, 2019**

**Supplement: Safety of Anti-Osteoarthritis Medications**

**Safety of symptomatic slow-acting drugs in osteoarthritis: outcomes of a systematic review and meta-analysis**

Germain Honvo, Jean-Yves Reginster, Véronique Rabenda, Anton Geerinck, Ouafa Mkinsi, Alexia Charles, Rene Rizzoli, Cyrus Cooper, Bernard Avouac, Olivier Bruyère

**ELECTRONIC SUPPLEMENTARY MATERIAL 3**

### 1. Publication bias in studies on Glucosamine sulfate

**Figure 48:** Funnel plot using data for the meta-analysis comparing gastrointestinal disorders with glucosamine sulfate versus placebo in patients with OA

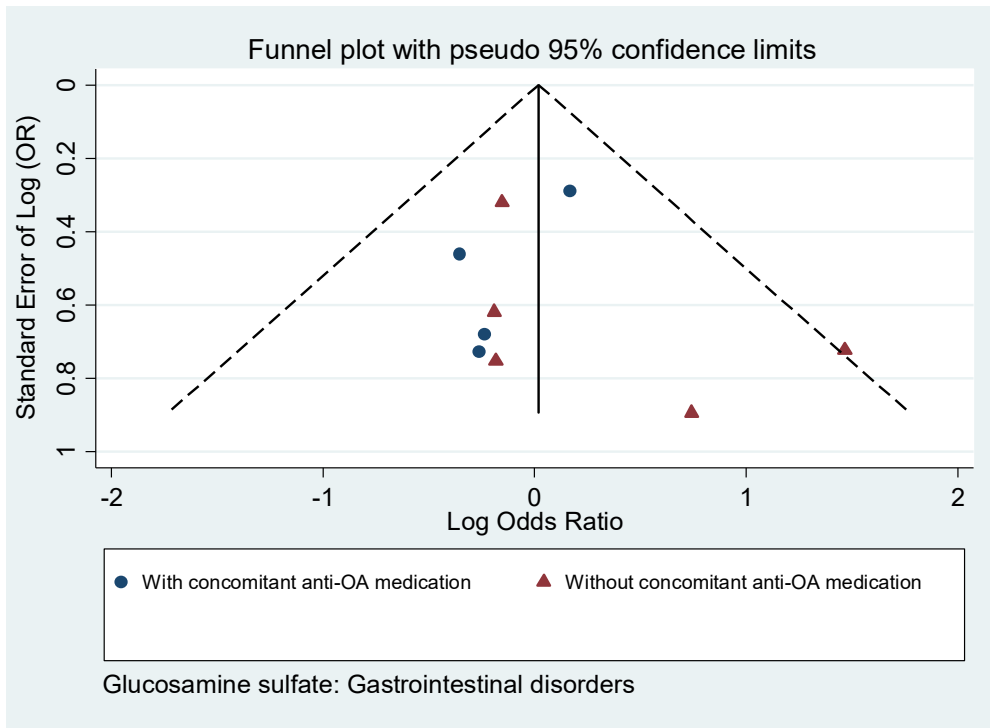

**Figure 49:** Funnel plot using data for the meta-analysis comparing nervous system disorders with glucosamine sulfate versus placebo in patients with OA

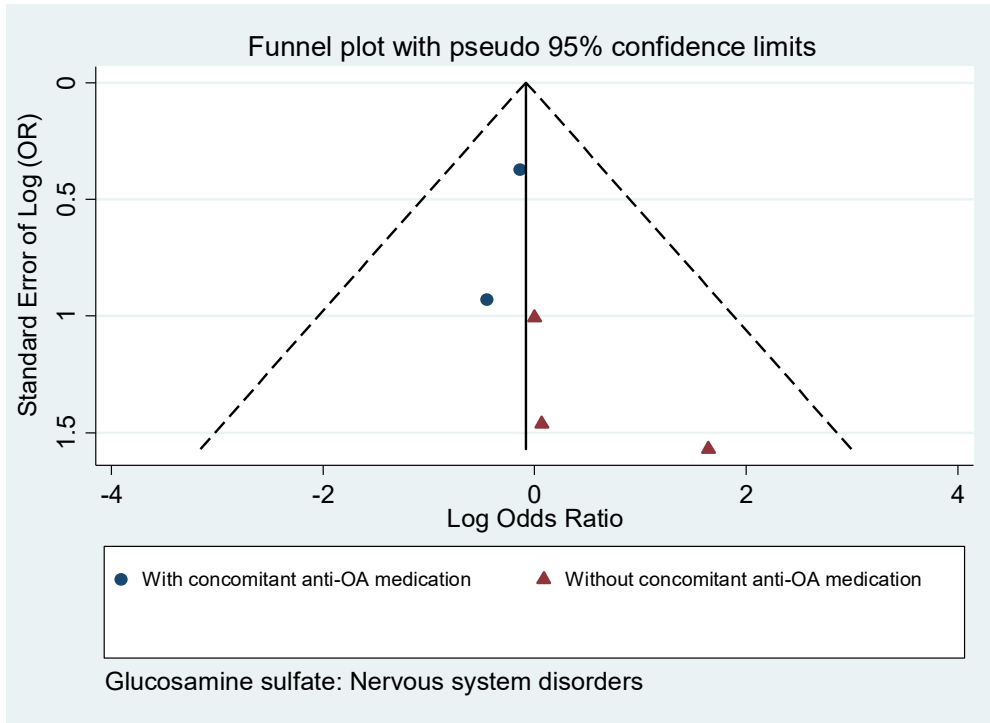

**Figure 50:** Funnel plot using data for the meta-analysis comparing skin and subcutaneous tissue disorders with glucosamine sulfate versus placebo in patients with OA

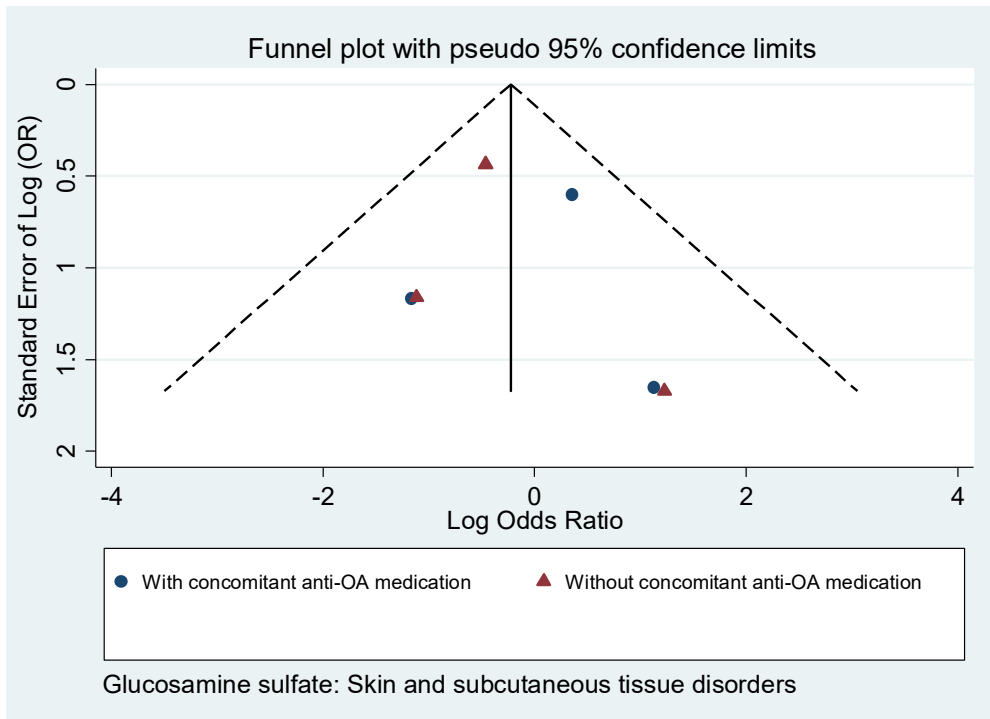

**Figure 51:** Funnel plot using data for the meta-analysis comparing musculoskeletal and connective tissue disorders with glucosamine sulfate versus placebo in patients with OA

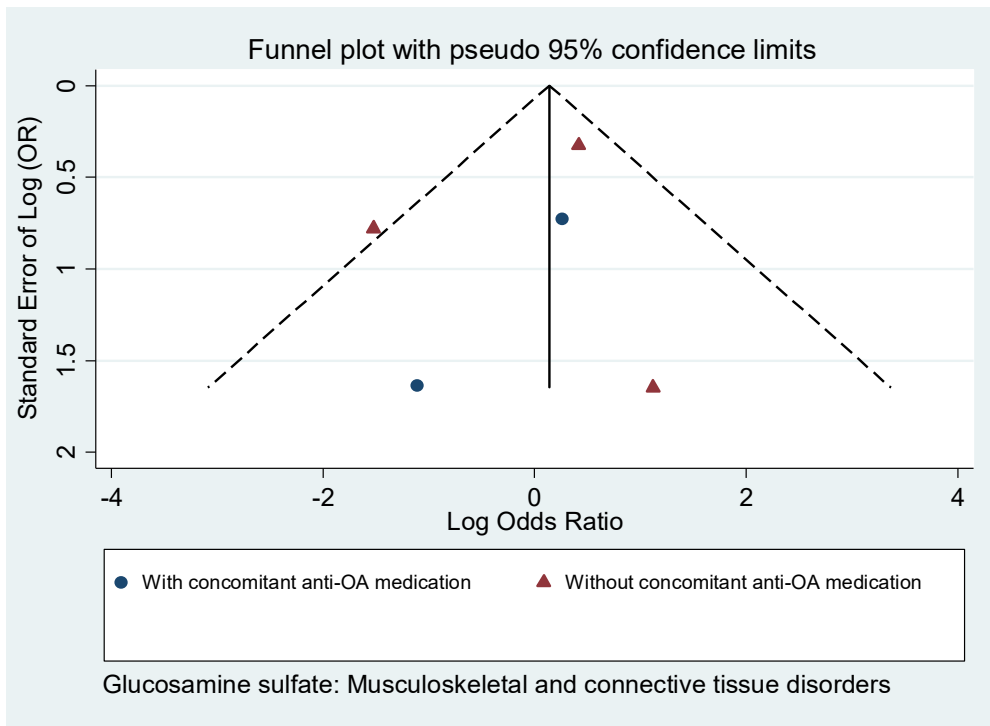

**Figure 52:** Funnel plot using data for the meta-analysis comparing dropouts due to adverse events with glucosamine sulfate versus placebo in patients with OA

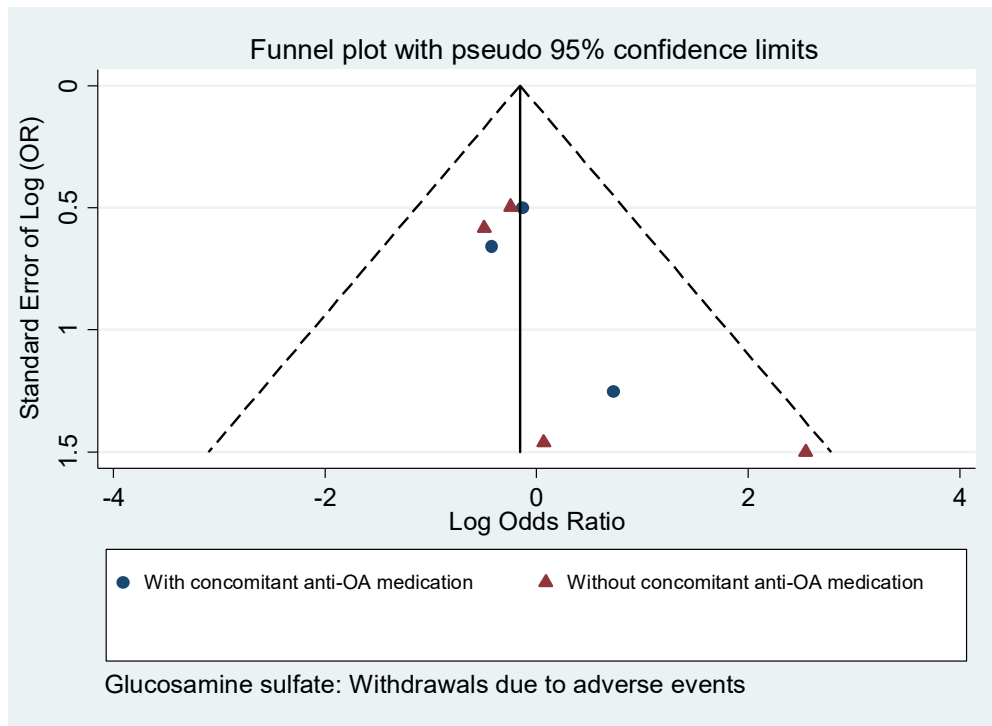

Note: Very few studies of glucosamine sulfate versus placebo (<5) were available for the meta-analyses for cardiac disorders, vascular disorders, severe adverse events, and serious adverse events; therefore, the funnel plots for these outcomes are not displayed. For renal and urinary disorders, all studies were with null events in both the GS and placebo groups.

## 2. Publication bias in studies on Chondroitin sulfate

**Figure 53:** Funnel plot using data for the meta-analysis comparing gastrointestinal disorders with chondroitin sulfate versus placebo in patients with OA

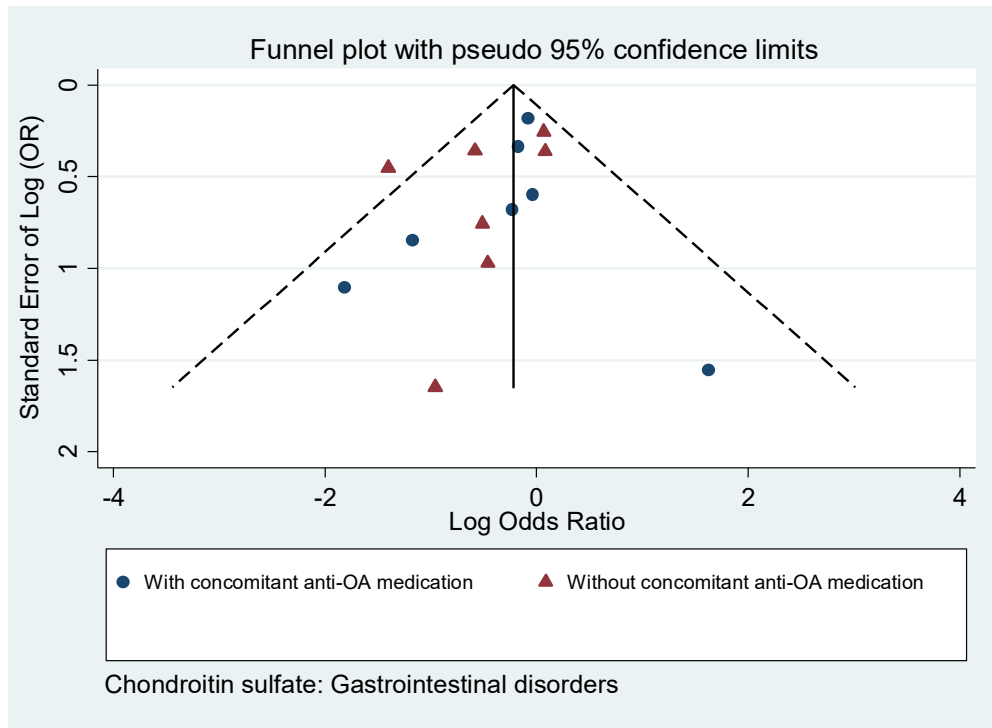

Harbord's test:  $p = 0.29$

**Figure 54:** Funnel plot using data for the meta-analysis comparing cardiac disorders with chondroitin sulfate versus placebo in patients with OA

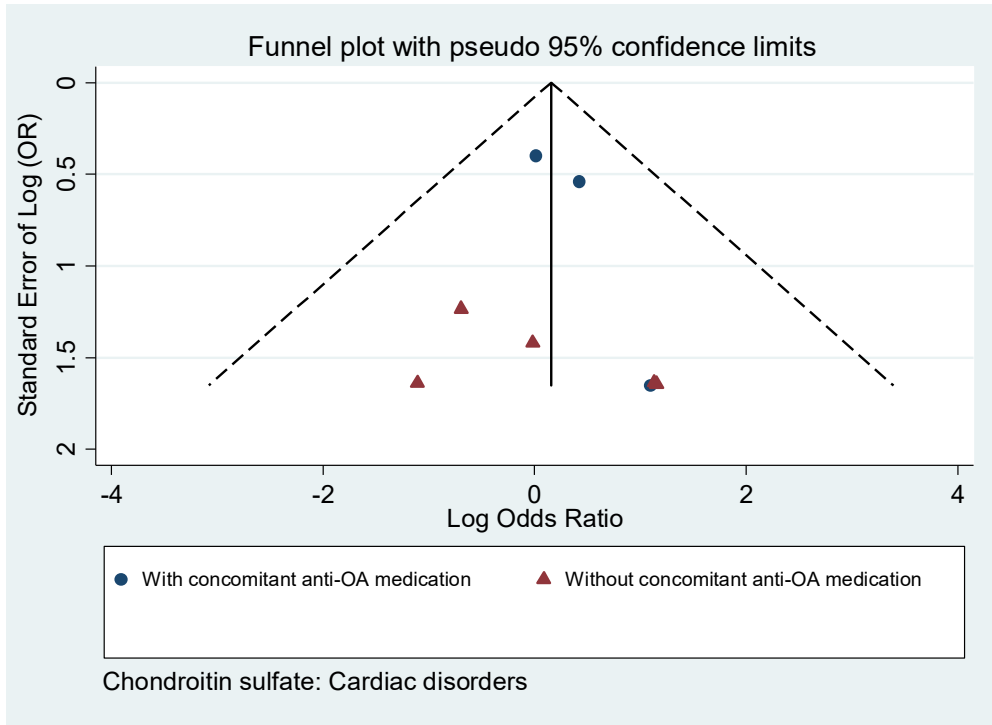

**Figure 55:** Funnel plot using data for the meta-analysis comparing vascular disorders with chondroitin sulfate versus placebo in patients with OA

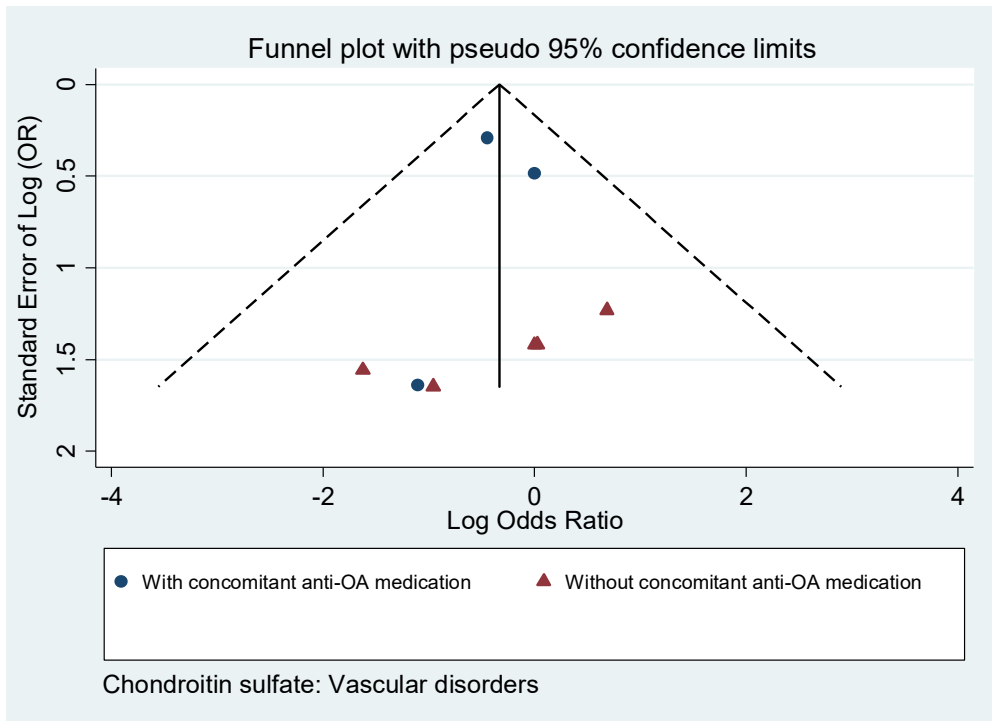

**Figure 56:** Funnel plot using data for the meta-analysis comparing nervous system disorders with chondroitin sulfate versus placebo in patients with OA

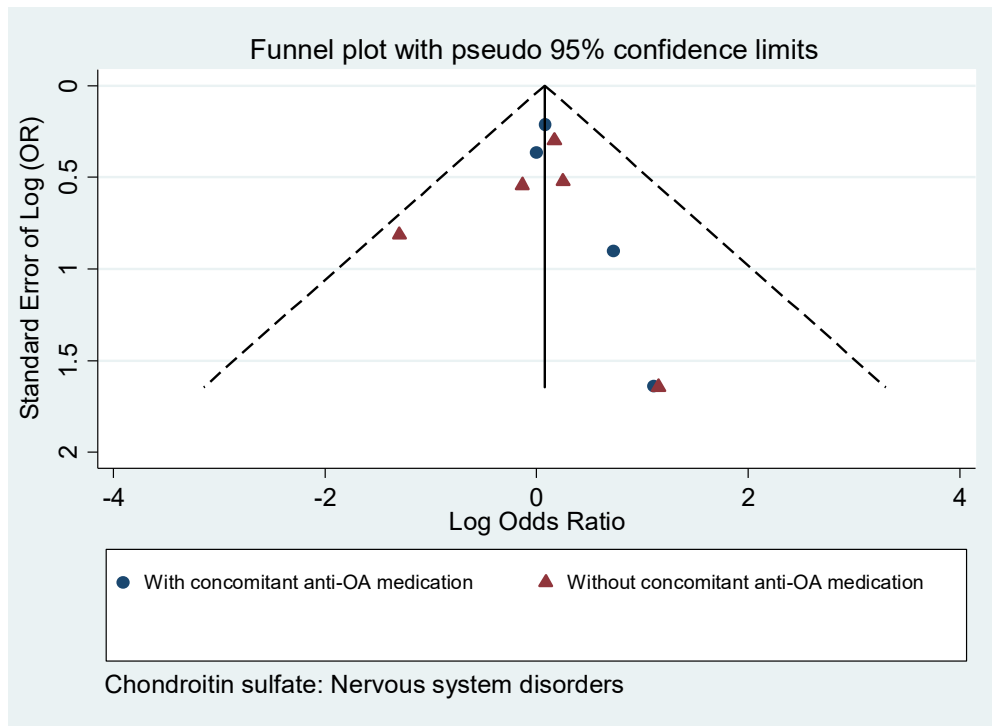



**Figure 57:** Funnel plot using data for the meta-analysis comparing skin and subcutaneous tissue disorders with chondroitin sulfate versus placebo in patients with OA

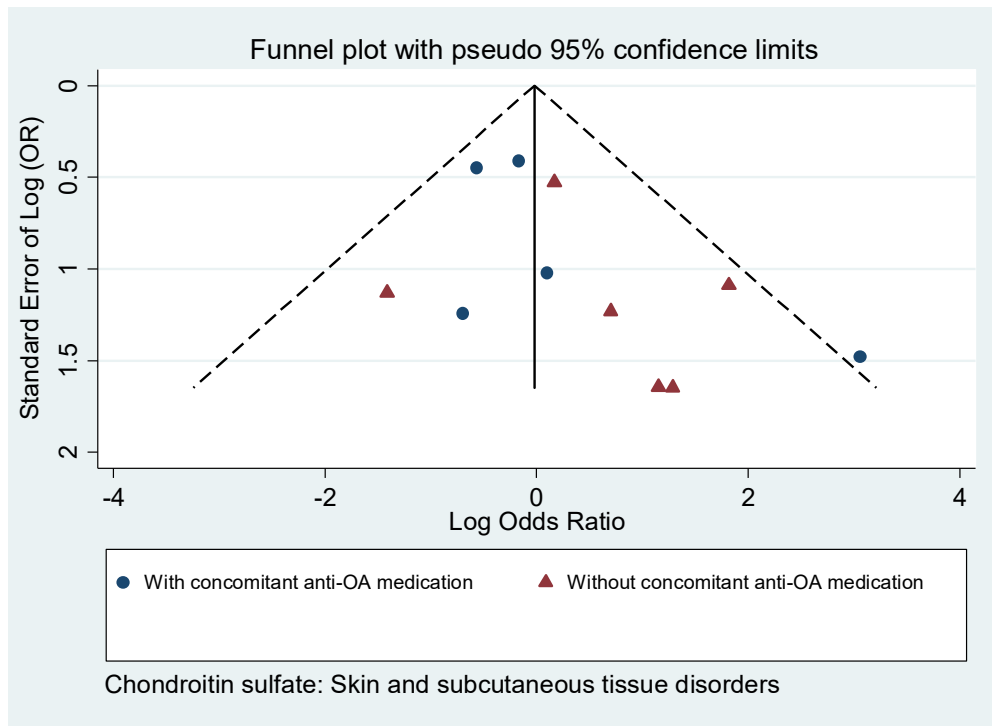

Harbord's test:  $p = 0.21$

**Figure 58:** Funnel plot using data for the meta-analysis comparing musculoskeletal and connective tissue disorders with chondroitin sulfate versus placebo in patients with OA

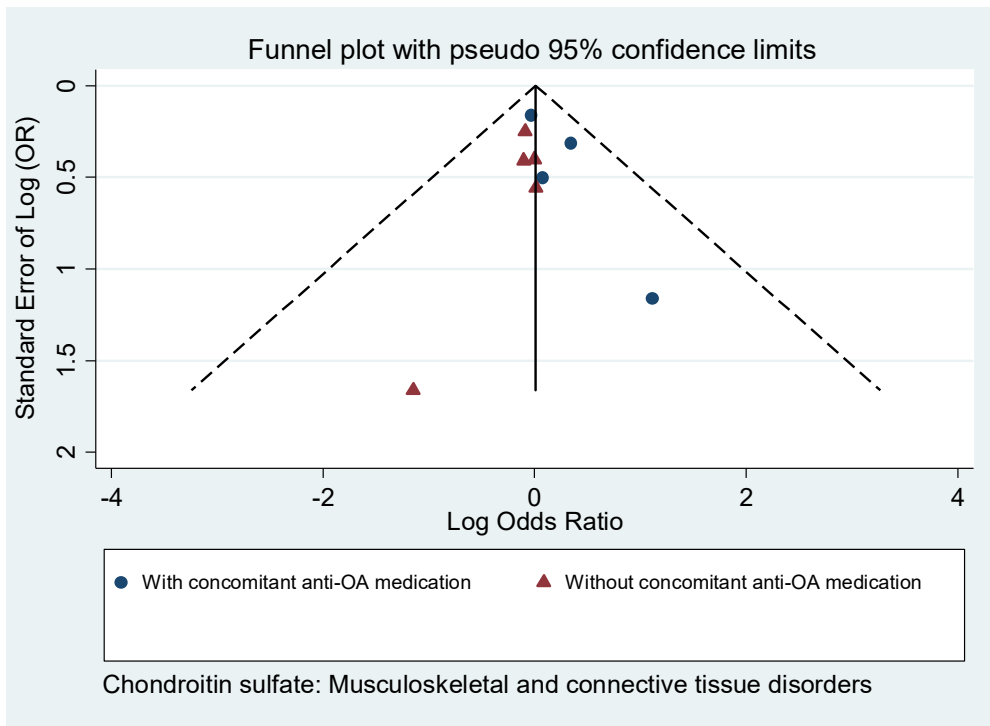

**Figure 59:** Funnel plot using data for the meta-analysis comparing renal and urinary system disorders with chondroitin sulfate versus placebo in patients with OA

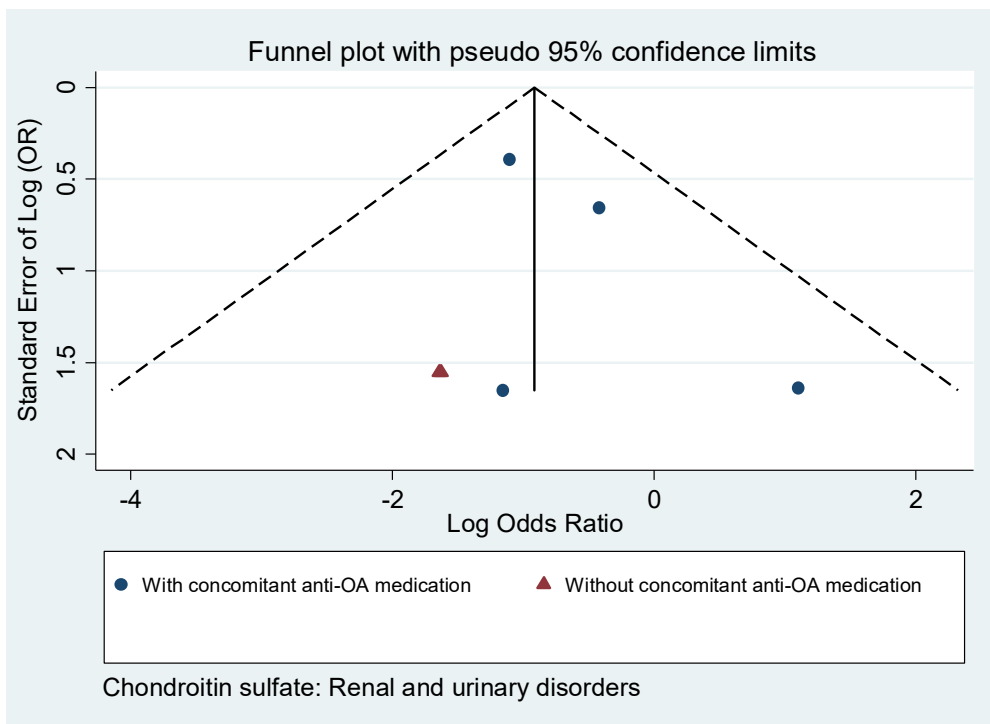

**Figure 60:** Funnel plot using data for the meta-analysis comparing severe adverse events with chondroitin sulfate versus placebo in patients with OA

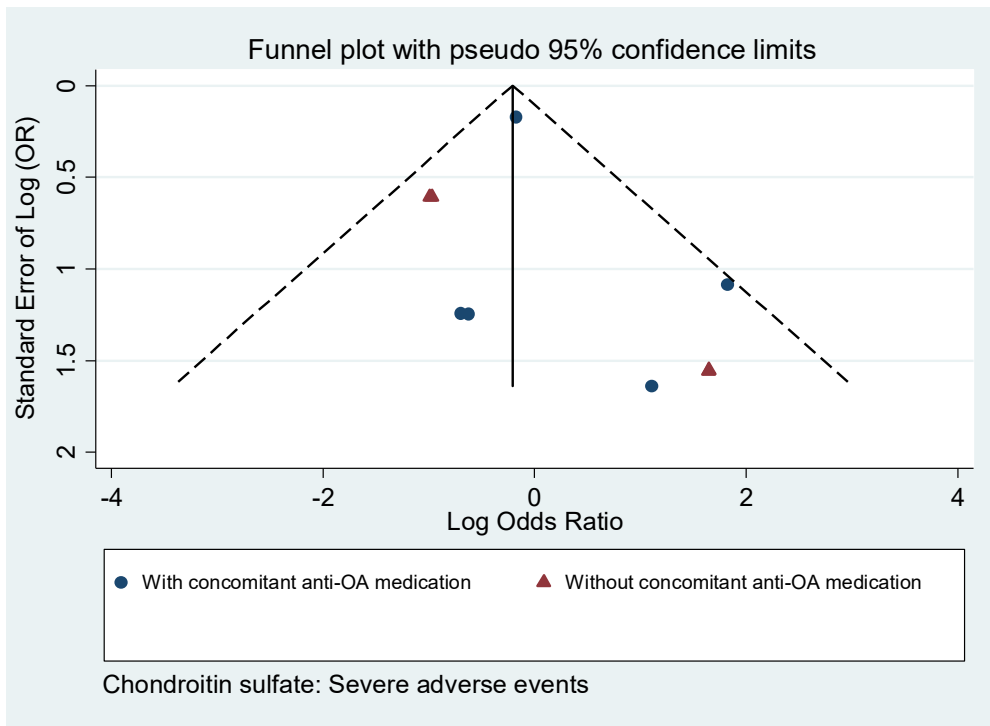

**Figure 61:** Funnel plot using data for the meta-analysis comparing serious adverse events with chondroitin sulfate versus placebo in patients with OA

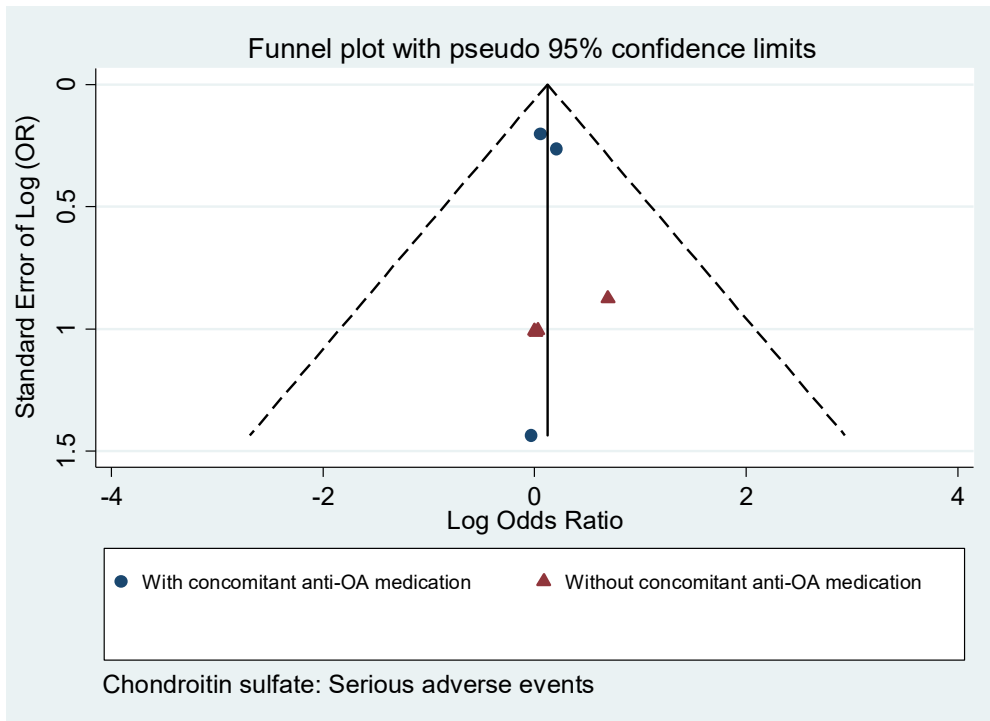

**Figure 62:** Funnel plot using data for the meta-analysis comparing dropouts due to adverse events with chondroitin sulfate versus placebo in patients with OA

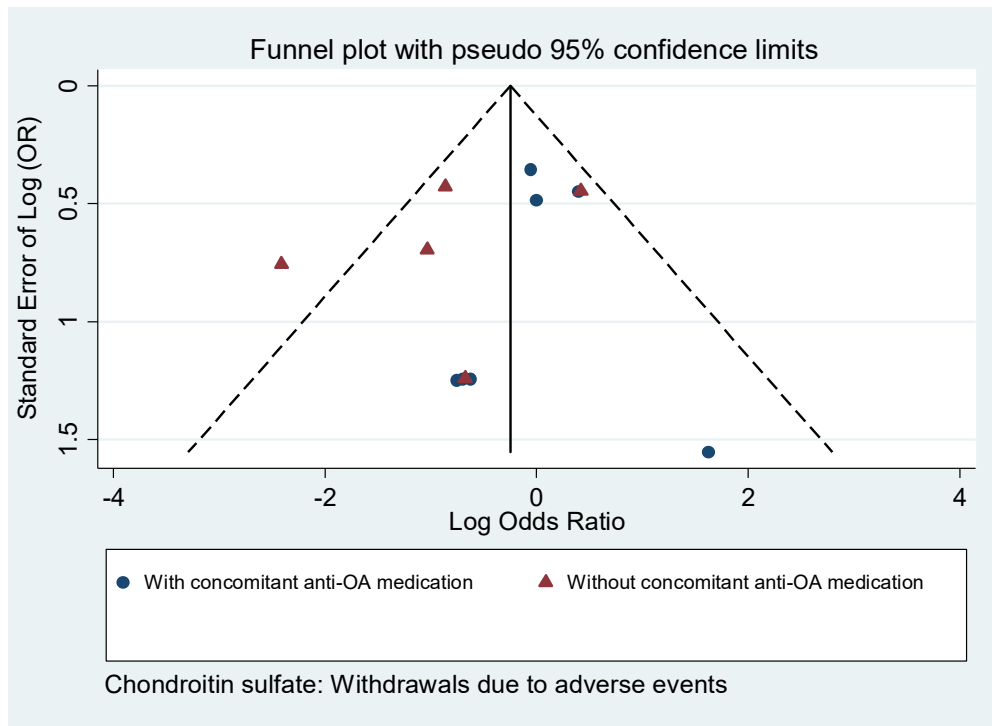

Harbord's test:  $p = 0.98$

### 3. Publication bias in studies on Diacerein

**Figure 63:** Funnel plot using data for the meta-analysis comparing gastrointestinal disorders with diacerein versus placebo in patients with OA

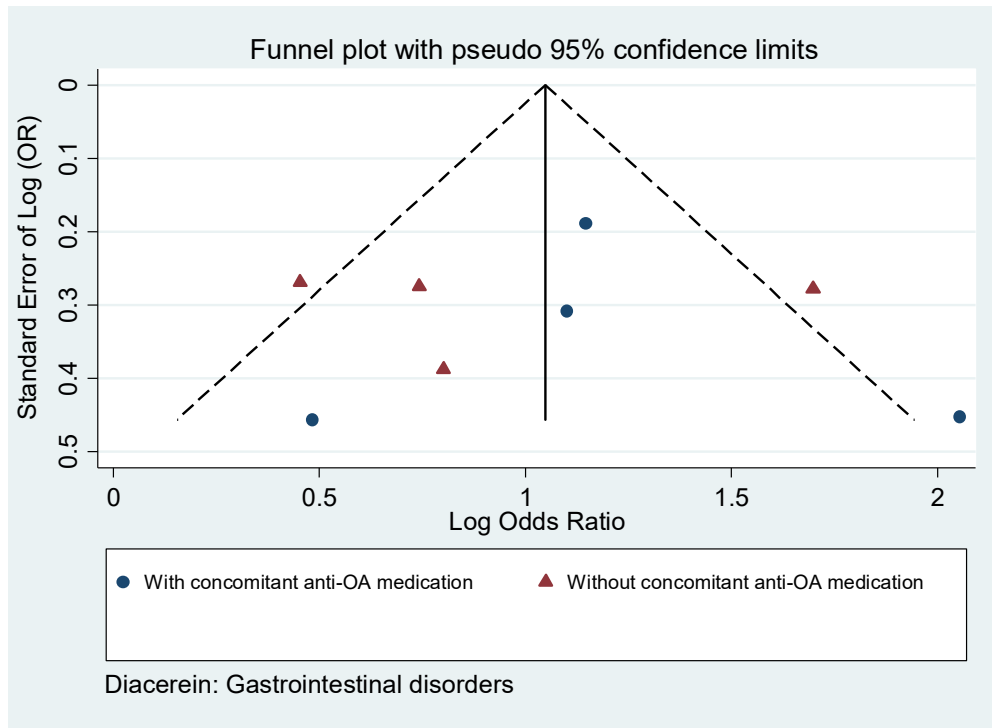

**Figure 64:** Funnel plot using data for the meta-analysis comparing cardiac disorders with diacerein versus placebo in patients with OA

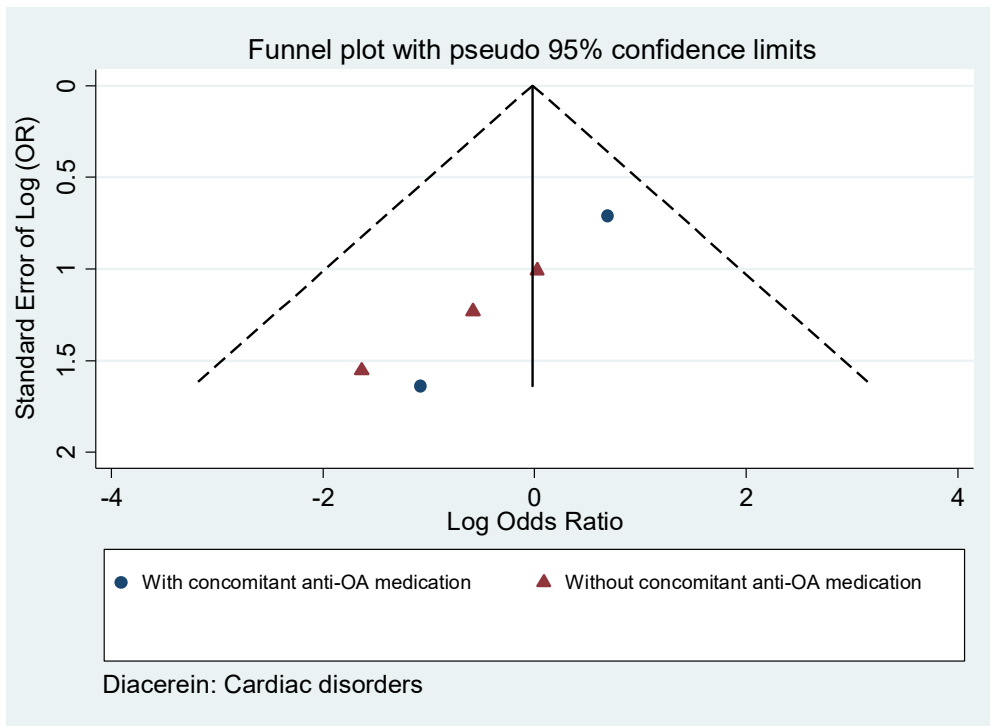

**Figure 65:** Funnel plot using data for the meta-analysis comparing vascular disorders with diacerein versus placebo in patients with OA

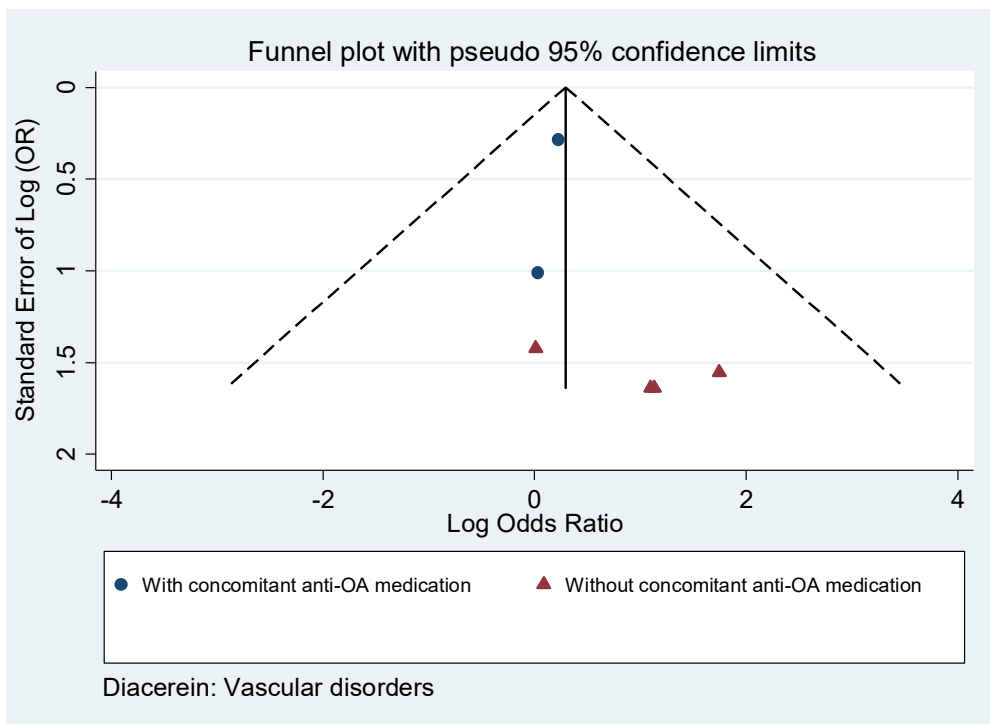

**Figure 66:** Funnel plot using data for the meta-analysis comparing nervous system disorders with diacerein versus placebo in patients with OA

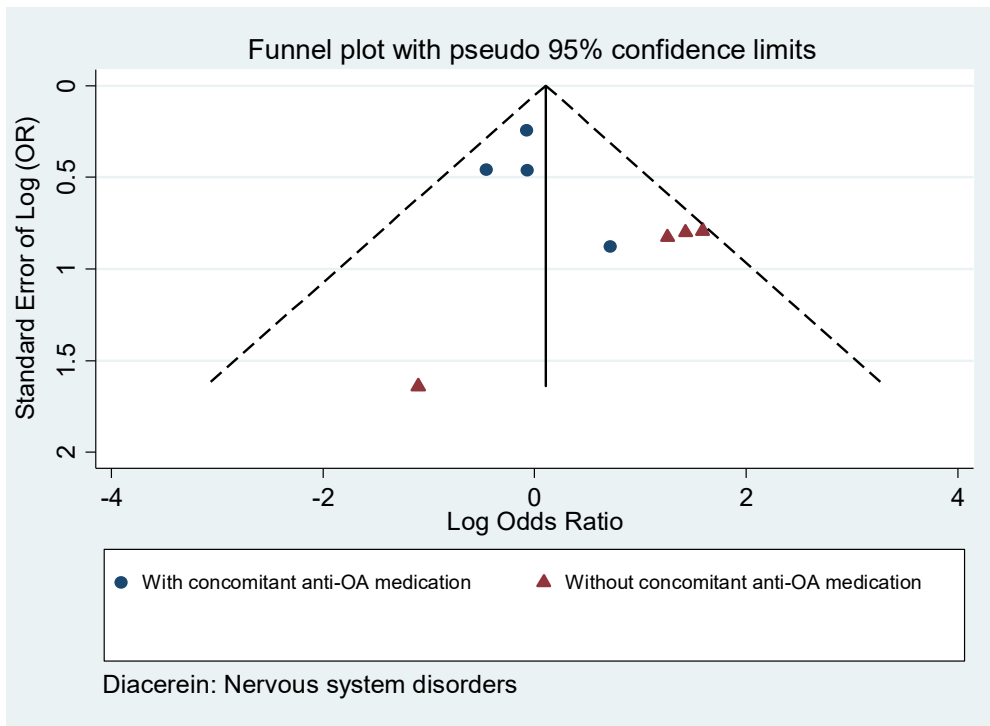

**Figure 67:** Funnel plot using data for the meta-analysis comparing skin and subcutaneous tissue disorders with diacerein versus placebo in patients with OA

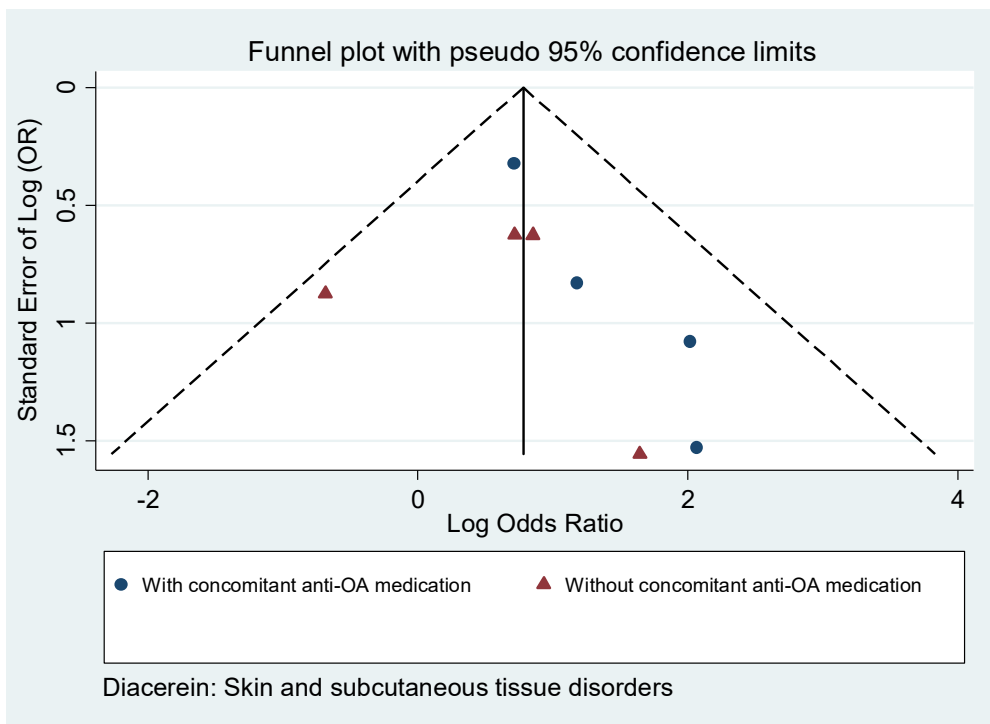

**Figure 68:** Funnel plot using data for the meta-analysis comparing musculoskeletal and connective tissue disorders with diacerein versus placebo in patients with OA

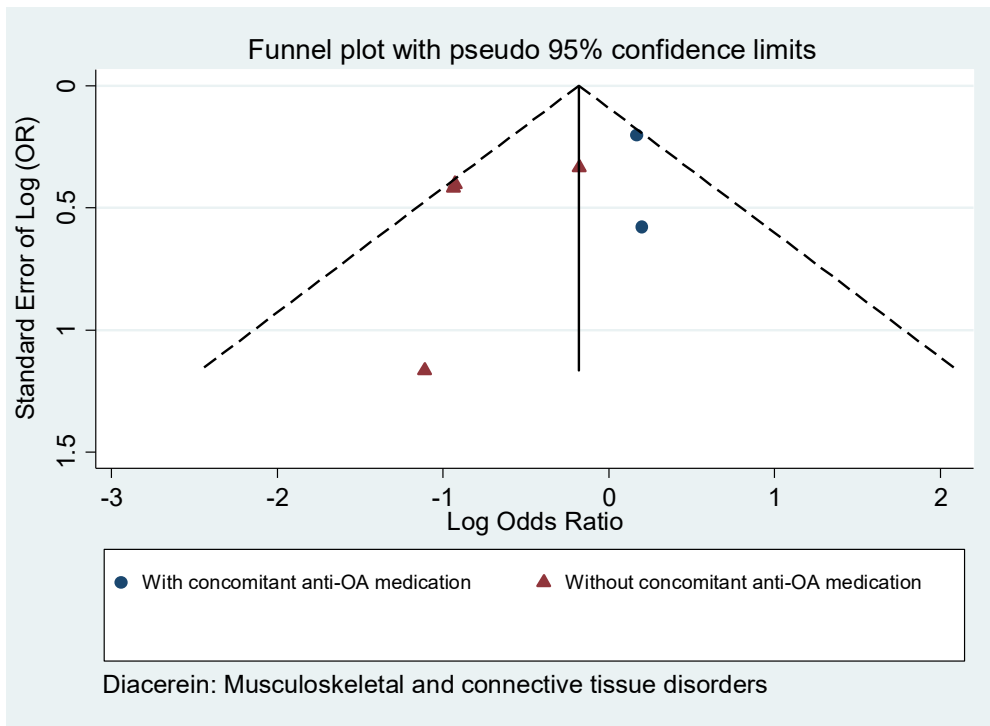

**Figure 69:** Funnel plot using data for the meta-analysis comparing renal and urinary disorders with diacerein versus placebo in patients with OA

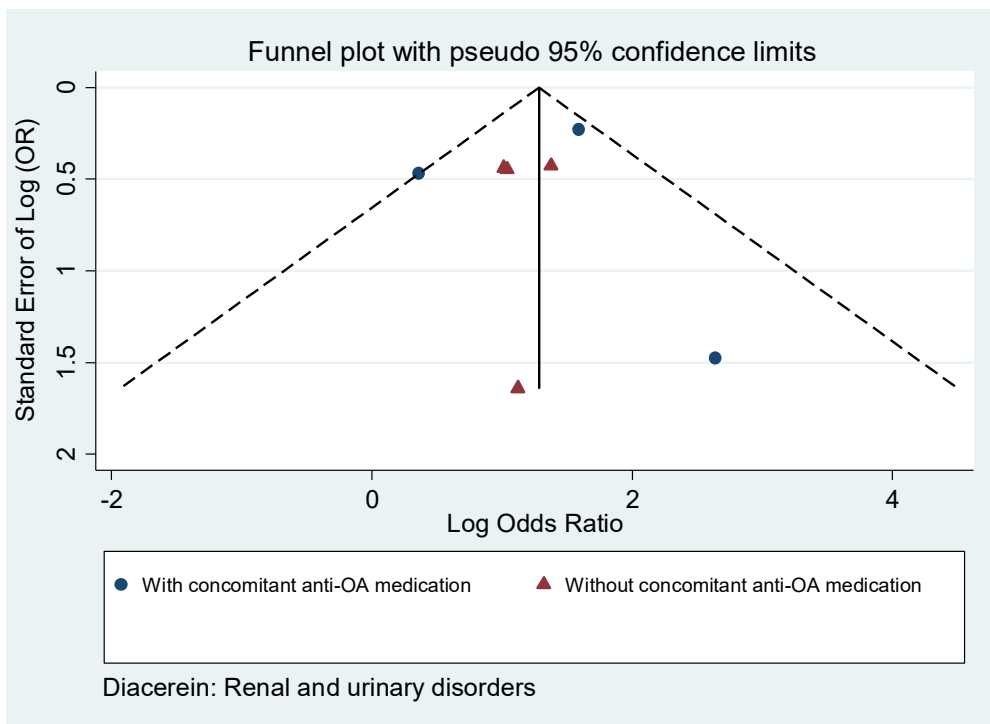



**Figure 70:** Funnel plot using data for the meta-analysis comparing serious adverse events with diacerein versus placebo in patients with OA

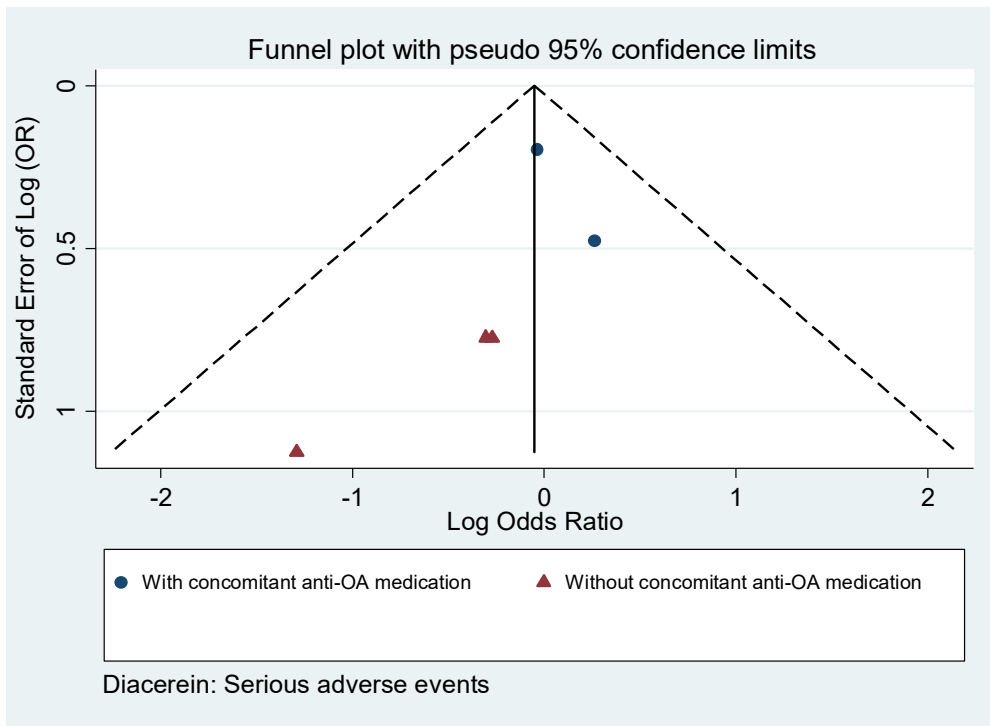

**Figure 71:** Funnel plot using data for the meta-analysis comparing dropouts due to adverse events with diacerein versus placebo in patients with OA

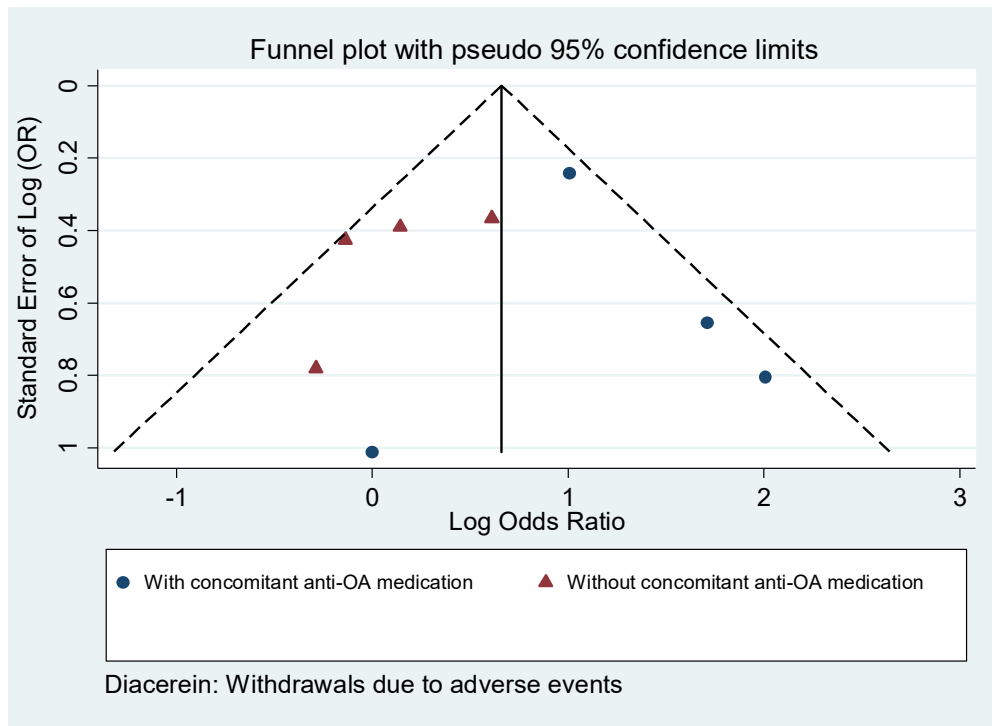

Note: Very few studies of diacerein versus placebo (<5) were available for the meta-analysis for severe adverse events; therefore, the funnel plot for this outcome is not displayed

#### 4. Publication bias in studies on Avocado/soybean unsaponifiables

**Figure 72:** Funnel plot using data for the meta-analysis comparing gastrointestinal disorders with avocado/soybean unsaponifiables versus placebo in patients with OA

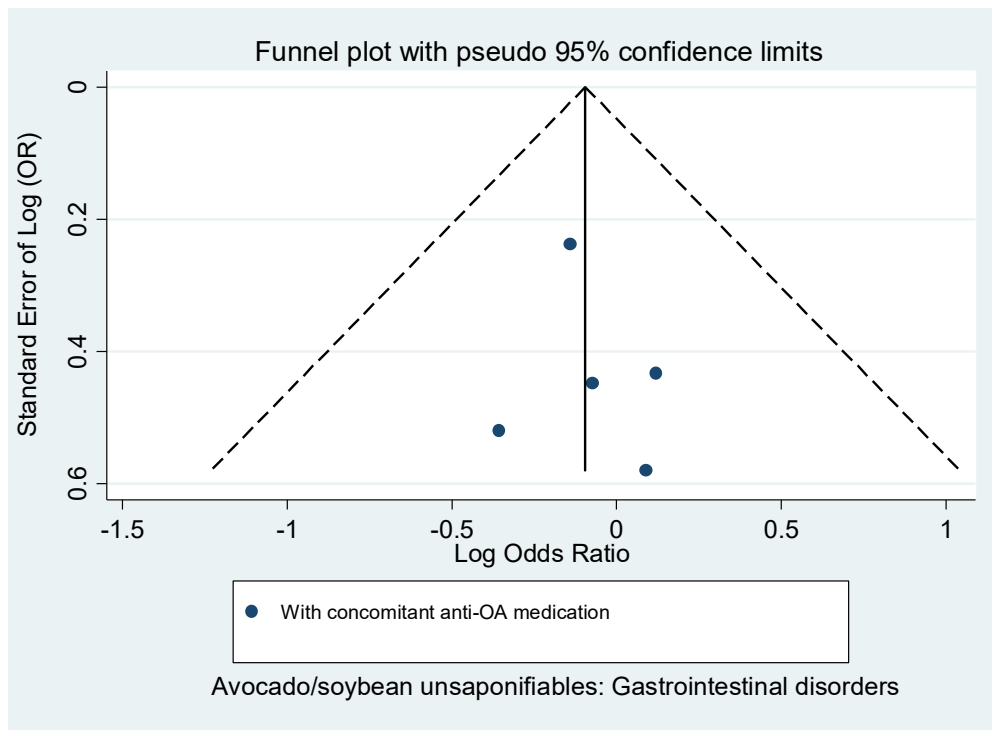

**Figure 73:** Funnel plot using data for the meta-analysis comparing nervous system disorders with avocado/soybean unsaponifiables versus placebo in patients with OA

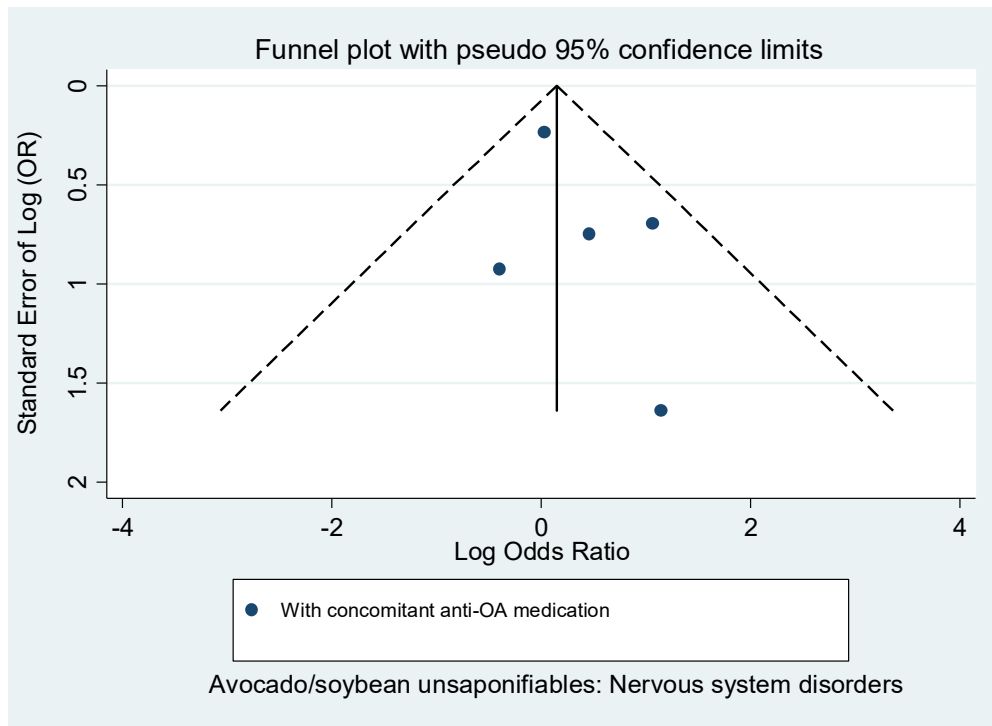

**Figure 74:** Funnel plot using data for the meta-analysis comparing severe adverse events with avocado/soybean unsaponifiables versus placebo in patients with OA

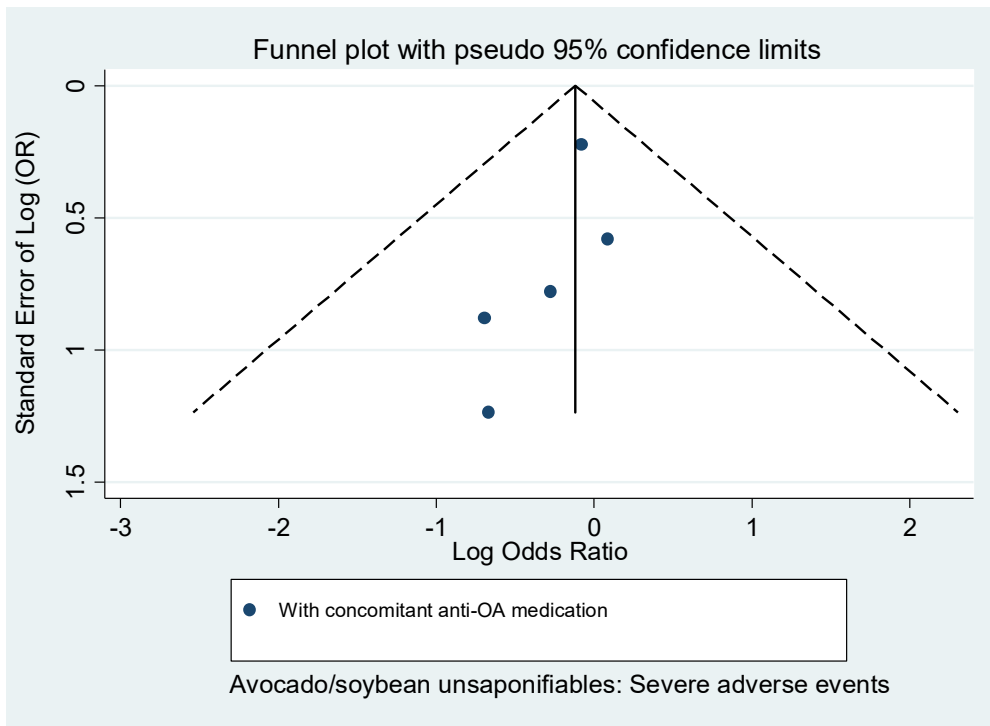

**Figure 75:** Funnel plot using data for the meta-analysis comparing dropouts due to adverse events with avocado/soybean unsaponifiables versus placebo in patients with OA

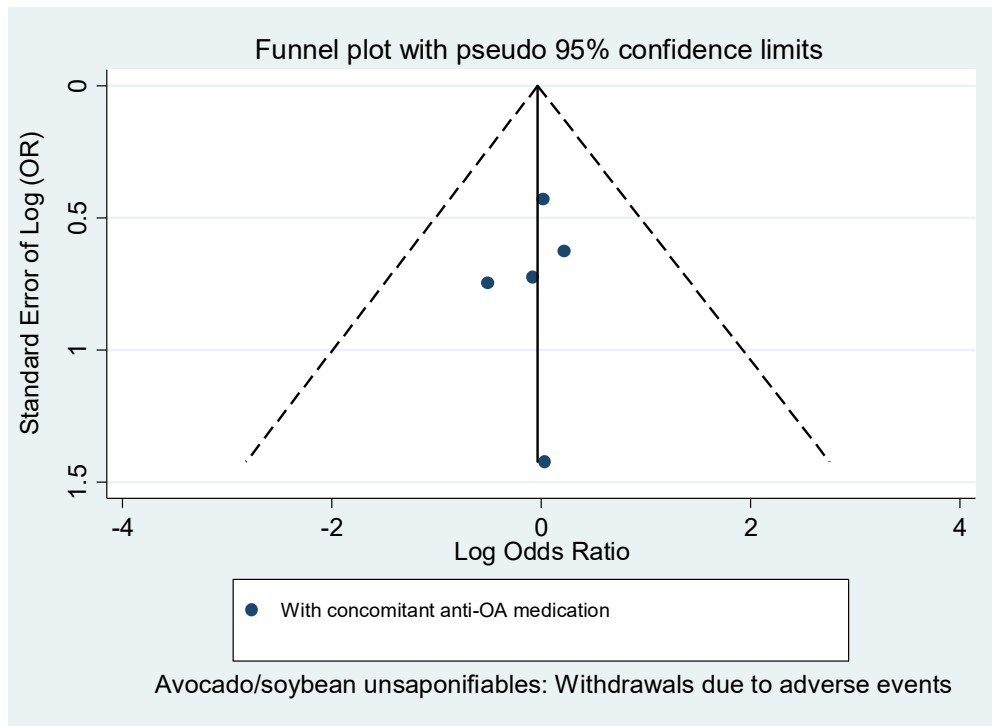

Note: Very few studies of avocado/soybean unsaponifiables versus placebo (<5) were available for the meta-analyses for cardiac disorders, vascular disorders, skin and subcutaneous tissue disorders, musculoskeletal and connective tissue disorders, renal and urinary disorders, and serious adverse events; therefore, the funnel plots for these outcomes are not displayed.
